# Supplementary material
Source: PubMed Central journal article supplement (PMC8086754)

# *Supporting Information*

## Structure-activity relationships of noncovalent immunoproteasome $\beta 5i$ selective dipeptides

Wenhu Zhan,<sup>1‡</sup> Pradeep K Singh,<sup>2‡†</sup> Yi Ban,<sup>1</sup> Xiaoping Qing,<sup>3</sup> Marie Dominique Ah Kioon,<sup>3</sup> Hao Fan,<sup>1</sup> Quanju Zhao,<sup>1</sup> Rong Wang,<sup>4</sup> George Sukenick,<sup>4</sup> Jane Salmon,<sup>3</sup> J David Warren,<sup>2</sup> Xiaojing Ma,<sup>1</sup> Franck J. Barrat,<sup>1,3</sup> Carl F. Nathan,<sup>1</sup> Gang Lin<sup>1\*</sup>

<sup>1</sup>Department of Microbiology & Immunology, Weill Cornell Medicine, 1300 York Ave, New York, NY 10065; <sup>2</sup>Department of Biochemistry, Milstein Chemistry Core Facility, Weill Cornell Medicine, 1300 York Ave, New York, NY 10065; <sup>3</sup>Autoimmunity and Inflammation Program, HSS Research Institute, Hospital for Special Surgery, New York, NY 10065, USA. <sup>4</sup>NMR Analytical Core Facility, Memorial Sloan Kettering Cancer Center.

### **Supporting Information**

#### **Table of Contents**

#### **S2 – Supplementary Tables**

#### **S3 – Supplementary Experimental section**

#### **S5 – References**

#### **S6 – <sup>1</sup>H and <sup>13</sup>C NMR Spectra**

#### **S42 – HRMS**

#### **S50– HPLC**

**Table S1.** IC<sub>50</sub>s of the select compounds against  $\beta$ 1i,  $\beta$ 2i of the immunoproteasome and  $\beta$ 1c,  $\beta$ 2c of the constitutive proteasome

| ID       | IC <sub>50</sub> ( $\mu$ M) |                  |                  |                  |
|----------|-----------------------------|------------------|------------------|------------------|
|          | $\beta$ 1i - PAL            | $\beta$ 1c - LLE | $\beta$ 2i - VLR | $\beta$ 2c - VLR |
| PKS3053  | > 33.3                      | > 33.3           | > 33.3           | > 33.3           |
| PKS21210 | > 33.3                      | > 33.3           | > 33.3           | > 33.3           |
| PKS21272 | > 33.3                      | > 33.3           | > 33.3           | > 33.3           |
| PKS21209 | > 33.3                      | > 33.3           | > 33.3           | > 33.3           |
| PKS21265 | > 33.3                      | > 33.3           | > 33.3           | > 33.3           |
| PKS21266 | > 33.3                      | > 33.3           | > 33.3           | > 33.3           |

PAL: Ac-PAL-AMC; LLE: Z-LLE-AMC; VLR: Z-VLR-AMC

**Table S2.** Protease selectivity of select compounds against Chymotrypsin, Cathepsin L and Trypsin. Percentages of remaining hydrolysis activity of each protease were measured in the presence of the compounds at concentrations 100, 33.3 and 11.1  $\mu$ M and calculated relative to enzymatic activity in the presence of DMSO. Results are means from two independent experiments and each in triplicate.

|          | Enzyme activity % at indicated compound concentrations |              |              |             |              |              |             |              |              |
|----------|--------------------------------------------------------|--------------|--------------|-------------|--------------|--------------|-------------|--------------|--------------|
|          | Chymotrypsin                                           |              |              | Cathepsin L |              |              | Trypsin     |              |              |
|          | 100 $\mu$ M                                            | 33.3 $\mu$ M | 11.1 $\mu$ M | 100 $\mu$ M | 33.3 $\mu$ M | 11.1 $\mu$ M | 100 $\mu$ M | 33.3 $\mu$ M | 11.1 $\mu$ M |
| PKS3053  | 0.0                                                    | 16.0         | 77.6         | 60.7        | 109.2        | 112.8        | 154.6       | 106.7        | 84.8         |
| PKS21210 | 118.4                                                  | 109.1        | 95.3         | 91.1        | 101.6        | 105.6        | 100.6       | 122.7        | 120.0        |
| PKS21272 | 102.4                                                  | 99.3         | 99.1         | 117.2       | 114.5        | 112.0        | 186.5       | 120.5        | 89.5         |
| PKS21209 | 114.8                                                  | 106.3        | 104.2        | 115.3       | 109.0        | 105.8        | 268.8       | 179.5        | 134.0        |
| PKS21265 | 104.1                                                  | 99.0         | 96.4         | 126.2       | 112.2        | 112.0        | 244.7       | 178.0        | 144.1        |
| PKS21266 | 105.6                                                  | 101.2        | 101.7        | 114.8       | 113.2        | 108.5        | 175.9       | 199.1        | 159.2        |

### **Supplementary Experimental section**

**Materials:**  $\alpha$ -Chymotrypsin (cat. No. C4129), Trypsin from porcine pancreas (cat. No. T-8253) and Cathepsin L from human liver (cat. No. C6854) were purchased from Sigma-Aldrich. Suc-LLVY-AMC, Z-LLE-AMC, Z-LRR-AMC, Ac-ANW-AMC and Suc-LY-AMC (cat. No. S-260) was from Boston Biochem and Z-FR-AMC (cat. No. GWB-E9DD43) was from GenWay Biotech. Proteasome-Glo™ Chymotrypsin-Like Cell-Based Assay kit (cat. No. G8660) and CellTiter-Glo® Luminescent Cell Viability Assay kits (cat. No. G7570) were from Promega (Madison, WI). Complete Media (CM) is RPMI 1640 (LTI 11875-085) with 10% FCS (cat. No. 26140), 1% L-glutamine (cat. No. 25030-081), 50 $\mu$ g/ml gentamicin (cat. No. 15750-060) were from Gibco. Separation Media (SM) is RPMI 1640 (LTI 11875-085) with 2.5mM EDTA (Gibco 15575-038). Lympholyte®-H Lymphocyte Separation Medium (CL5020) was from Cedarlane Laboratories. 96-well round bottom plates (Falcon 3077). Unifilter GF/C plates (cat. No. 5007185) were from Packard. <sup>3</sup>H-thymidine (Net-027005MC) was from PerkinElmer.

### **Protease selectivity assays**

Protease selectivity of select compounds was performed as reported with minor changes.<sup>1</sup> Briefly, 1  $\mu$ L of select compound at concentrations of 100, 33.3 and 11.1  $\mu$ M in DMSO were spotted into the bottom of a black 96-well plate. Reaction buffer (100  $\mu$ L, see table below) containing proteases and their substrates were dispensed into each well, and the plate was then spun in a simple benchtop plate centrifuge at 1000 rpm for 1 min, followed by recording the fluorescence of the product AMC ( $\lambda_{ex}$  360 nm and  $\lambda_{em}$  460 nm) on a SpectraMax M5 plate reader over 1.5 h. Percentages of remaining activity of proteases were calculated relative to DMSO.

| Protease (final con.)                | Substrate (final con.)       | Buffer                                                                   |
|--------------------------------------|------------------------------|--------------------------------------------------------------------------|
| $\alpha$ -Chymotrypsin (2 nM)        | Suc-Leu-Tyr-AMC (50 $\mu$ M) | 50 mM Tris, 100 mM NaCl, 5 mM CaCl <sub>2</sub> , 0.01% Tween 20, pH 8.0 |
| Trypsin from porcine pancreas (4 nM) | Z-FR-AMC (12 $\mu$ M)        | 50 mM Tris, 100 mM NaCl, 5 mM CaCl <sub>2</sub> , 0.01% Tween 20, pH 8.0 |
| Cathepsin L from human liver (2 nM)  | Z-FR-AMC (37.5 $\mu$ M)      | 100 mM sodium acetate, 5 mM DTT, 1 mM EDTA, pH 5.5                       |

### Human PBMC Proliferation Assay

All Informed consents were obtained from blood donors after the nature and possible consequences of the studies were explained.

**PBMC Isolation-** The procedure was carried out as our previous report.<sup>1</sup> In brief, the EDTA-treated blood samples from donors were separated by Ficoll as follows: The syringes of blood were inverted to mix and divided equally among 50ml tubes (~20ml/tube) containing 20ml separation media (SM), RPMI 1640 with 2.5mM EDTA, and carefully loaded on top of 10ml of Ficoll in each tube. Tubes were spun at 1800 rpm for 20 min (low brake). The interfaces from each two tubes were combined into one 50ml tube, brought up to 45ml with SM and spun at 1700 rpm for 8 min. Supernatant was aspirated; and cells were resuspended in 45ml SM and spun at 1100 rpm (to remove platelets) for 8 min. Cells were then resuspended in Complete Media (CM).

**Methods:** These experiments were carried out as our previously reported with slight changes.<sup>1</sup> Compounds were tested in a series 3x concentration dilution (final concentrations were from 3  $\mu$ M to 0.56 nM as indicated in plate map). 10 $\mu$ l of each appropriate dilution in CM were added

to the appropriate wells. The PBMC cells in CM at  $1 \times 10^6$ /mL, 100 $\mu$ l/well (100,000 cells/well) were then added to the appropriate wells of the plates and were incubated for 1hr at 37°C, 5% CO<sub>2</sub> prior to adding the stimuli, 50 $\mu$ l Anti-human CD3 at 0.5  $\mu$ g/ml. All wells were brought up to 200 $\mu$ l with 0.1% DMSO/CM. The plates were incubated at 37°C, 5% CO<sub>2</sub> for 5 days. On day 5, 100 $\mu$ l supernatant was removed from each well of the PBMC assay plates, and 0.5 $\mu$ Ci of <sup>3</sup>H-Thymidine in 100 $\mu$ l CM was added to each well, and incubated for 6 hours. The assay plates were harvested on a Packard Filtermate Harvester according to the manufacturer's instruction. The plates were dried overnight at room temperature or for 1hr in a 37°C vacuum oven and then 50 $\mu$ l/well PerkinElmer Microscint-20 scintillant was added. The plates were then counted on a Packard TopCount scintillation counter.

Plate map for assay of anti-human CD3 antibody stimulated human PBMC Proliferation

|   | 1     | 2          | 3         | 4         | 5        | 6        | 7          | 8          | 9          | 10             | 11           | 12 |
|---|-------|------------|-----------|-----------|----------|----------|------------|------------|------------|----------------|--------------|----|
| A |       |            |           |           |          |          |            |            |            |                |              |    |
| B | Cmpd1 | 3000<br>nM | 900<br>nM | 270<br>nM | 81<br>nM | 24<br>nM | 7.29<br>nM | 2.19<br>nM | 0.56<br>nM | PBMC<br>+ xCD3 | PBMC<br>only |    |
| C |       | "          | "         | "         | "        | "        | "          | "          | "          | "              | "            |    |
| D |       | "          | "         | "         | "        | "        | "          | "          | "          | "              | "            |    |
| E | Cmpd2 | 3000<br>nM | 900<br>nM | 270<br>nM | 81<br>nM | 24<br>nM | 7.29<br>nM | 2.19<br>nM | 0.56<br>nM | PBMC<br>+ xCD3 | PBMC<br>only |    |
| F |       | "          | "         | "         | "        | "        | "          | "          | "          | "              | "            |    |
| G |       | "          | "         | "         | "        | "        | "          | "          | "          | "              | "            |    |
| H |       |            |           |           |          |          |            |            |            |                |              |    |

## References

1. Singh, P. K.; Fan, H.; Jiang, X.; Shi, L.; Nathan, C. F.; Lin, G., Immunoproteasome beta5i-Selective Dipeptidomimetic Inhibitors. *ChemMedChem* **2016**, *11* (19), 2127-2131.



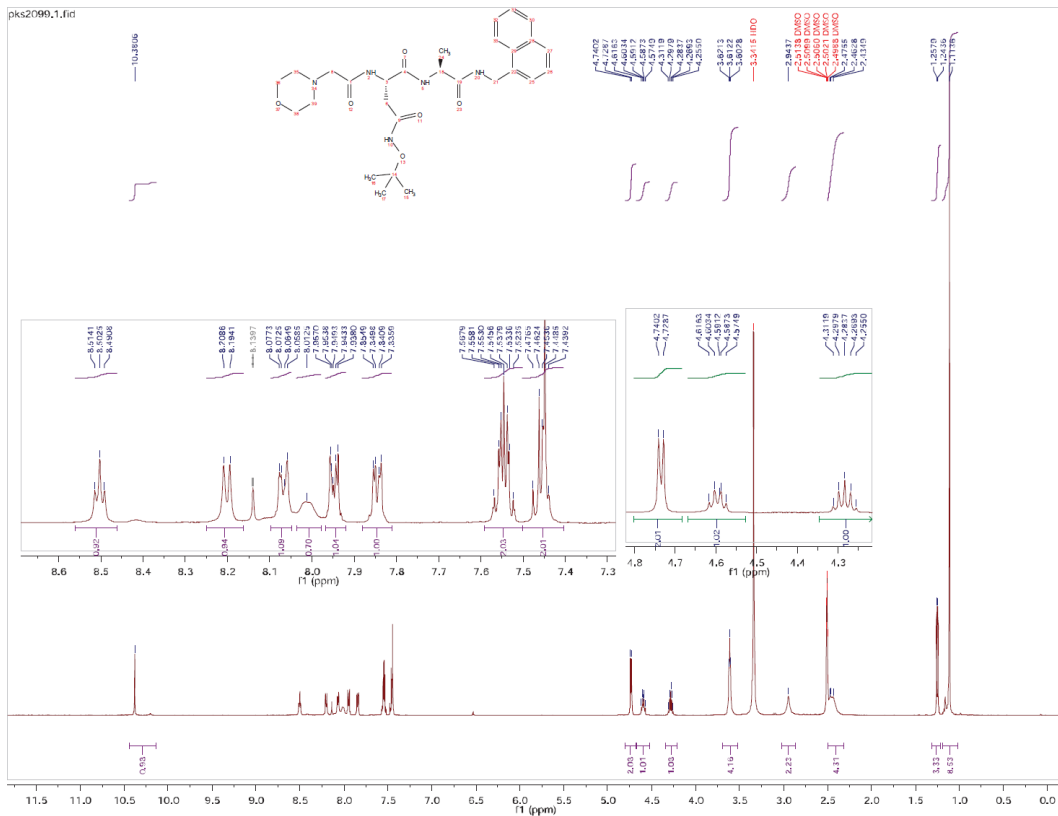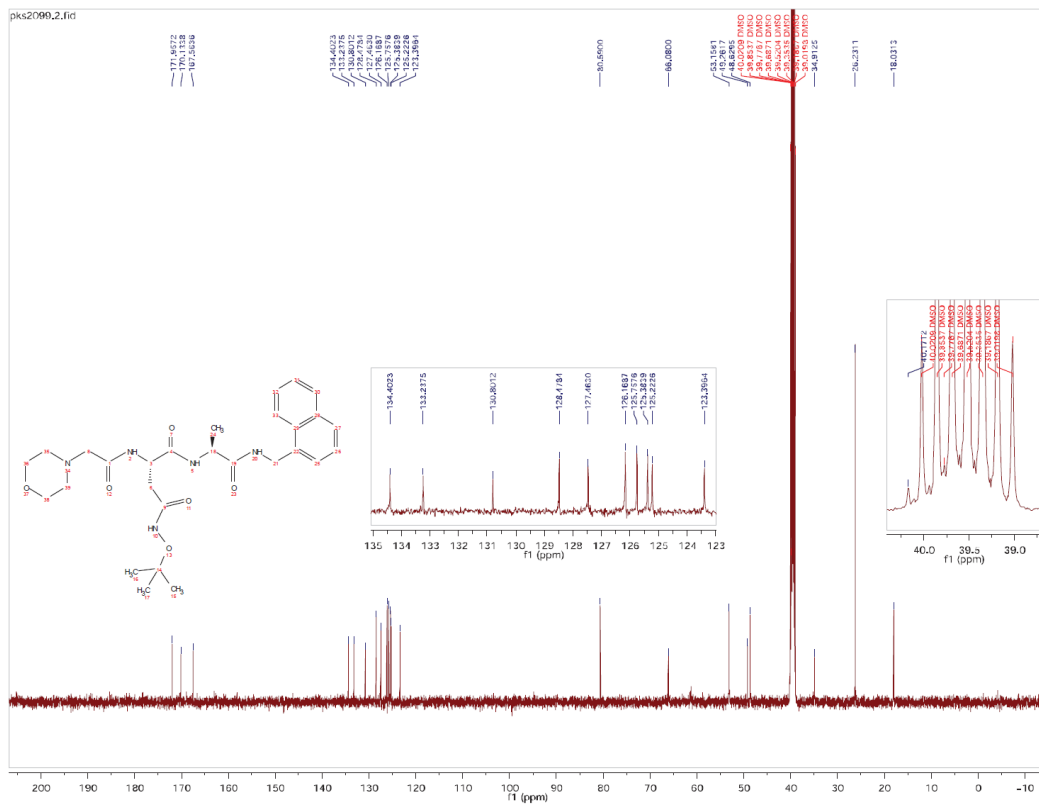







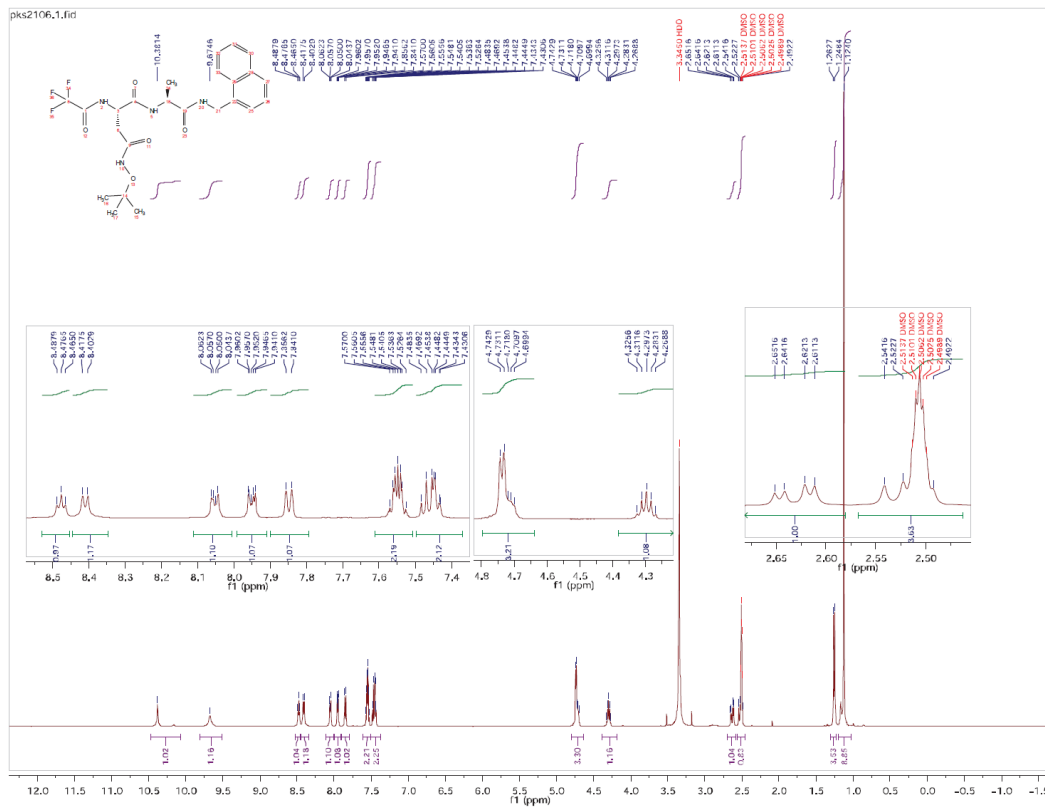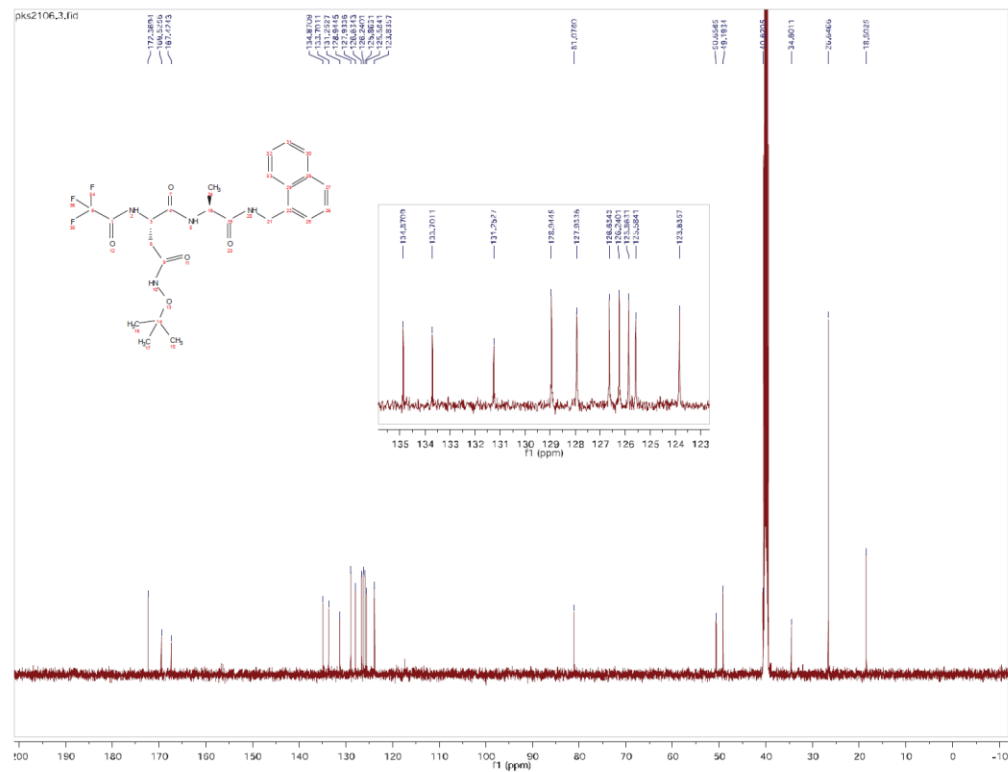

















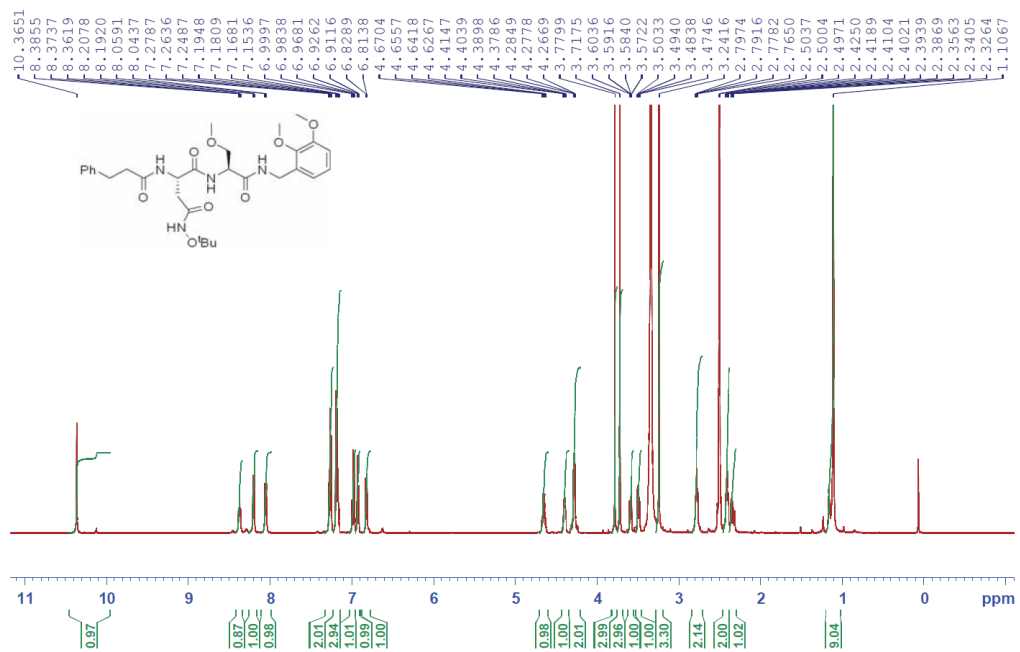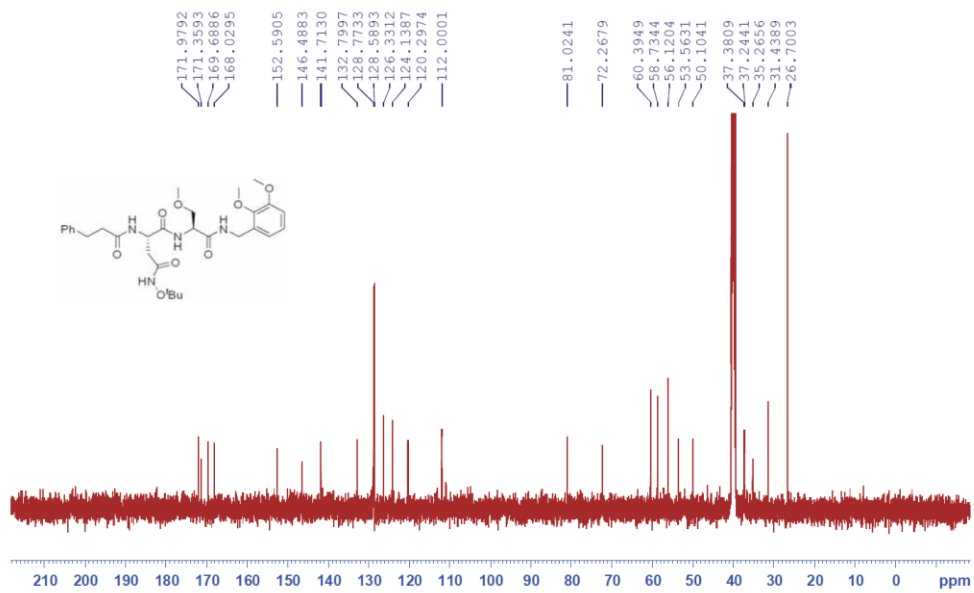











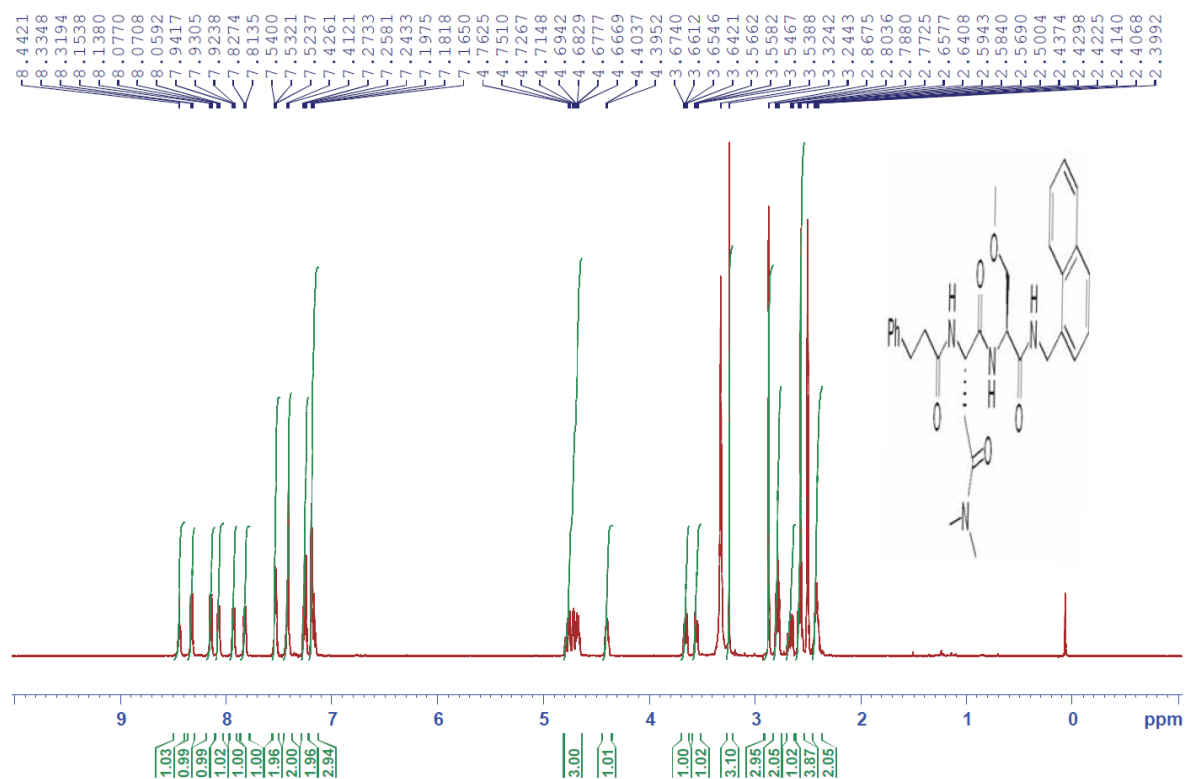







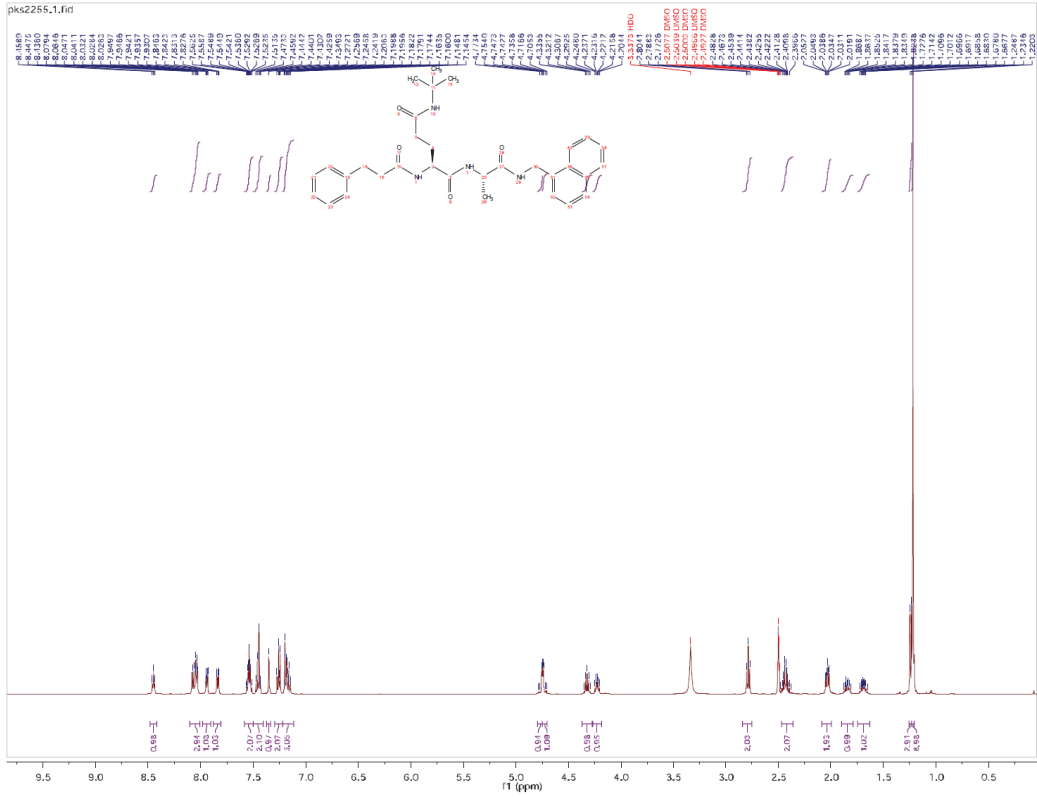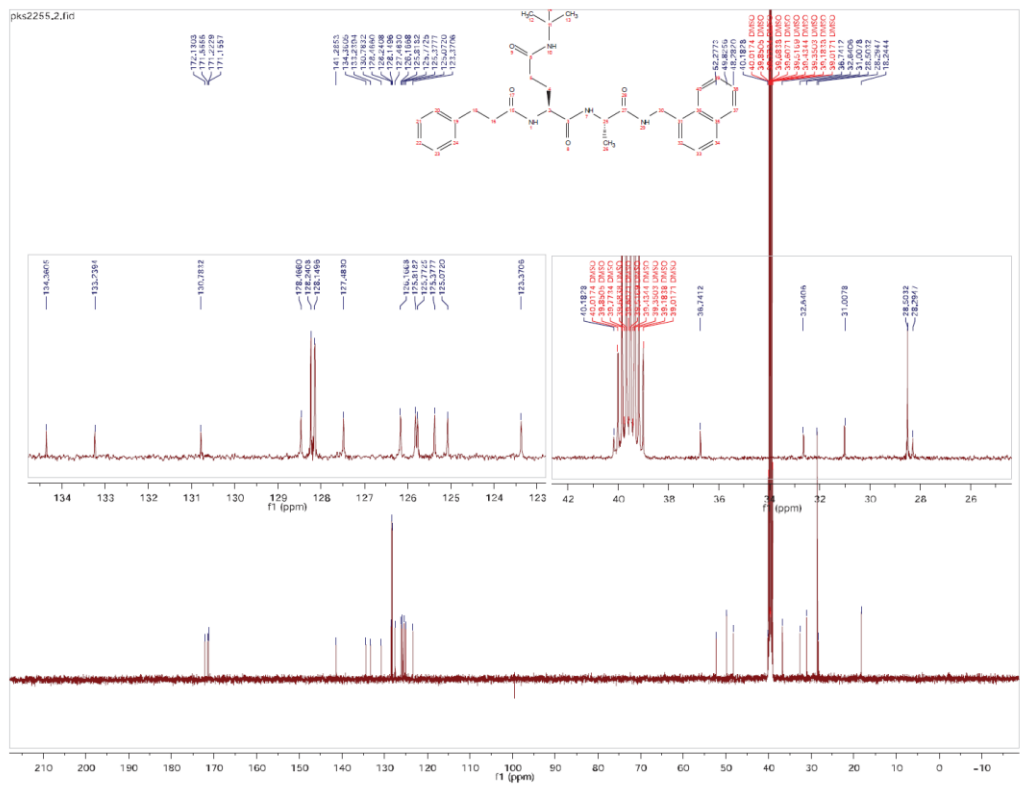



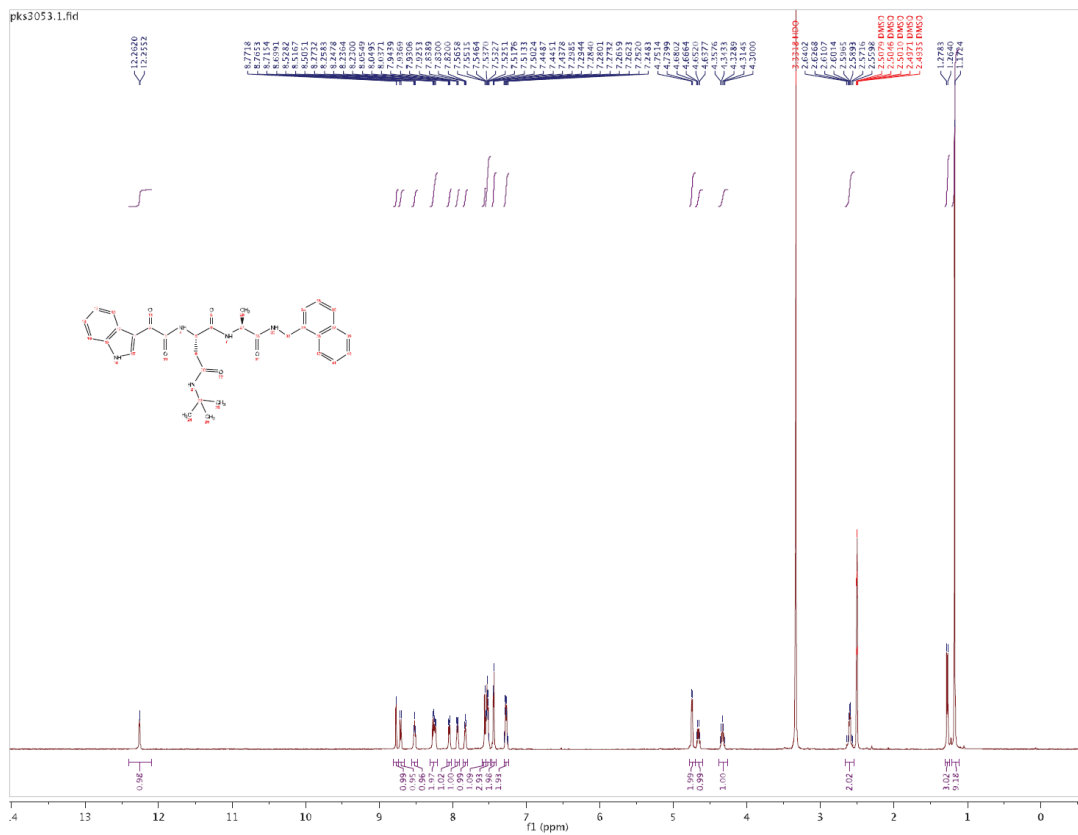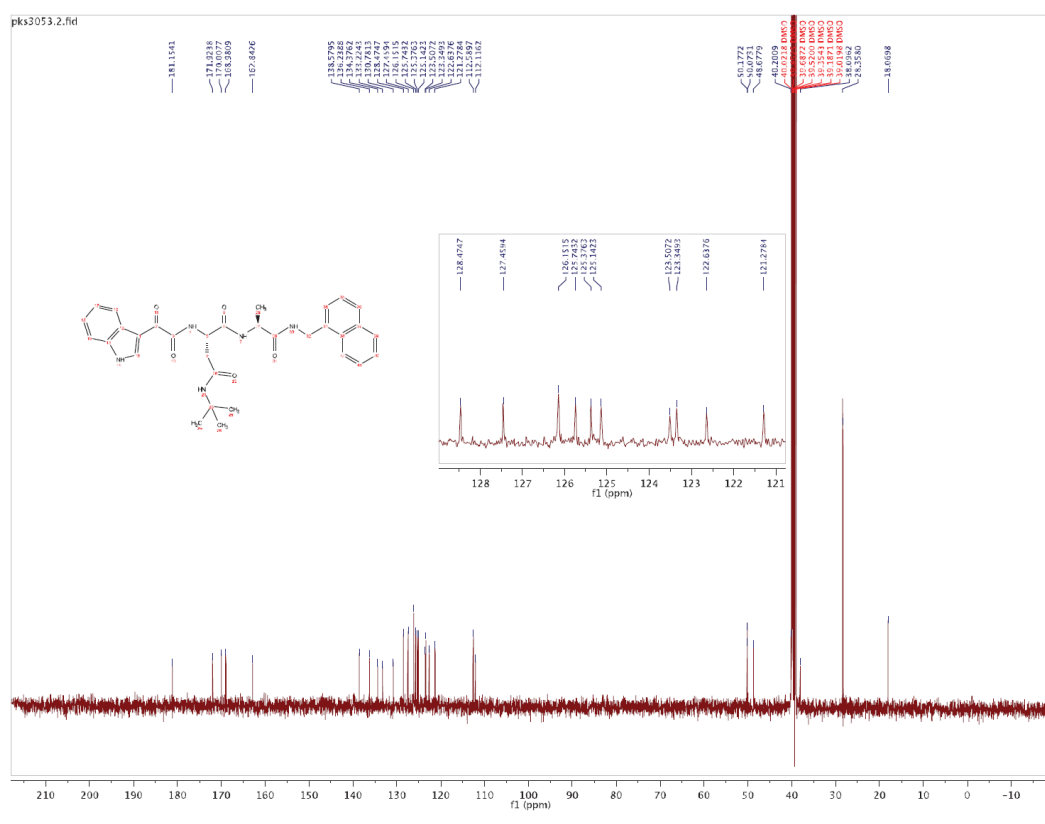



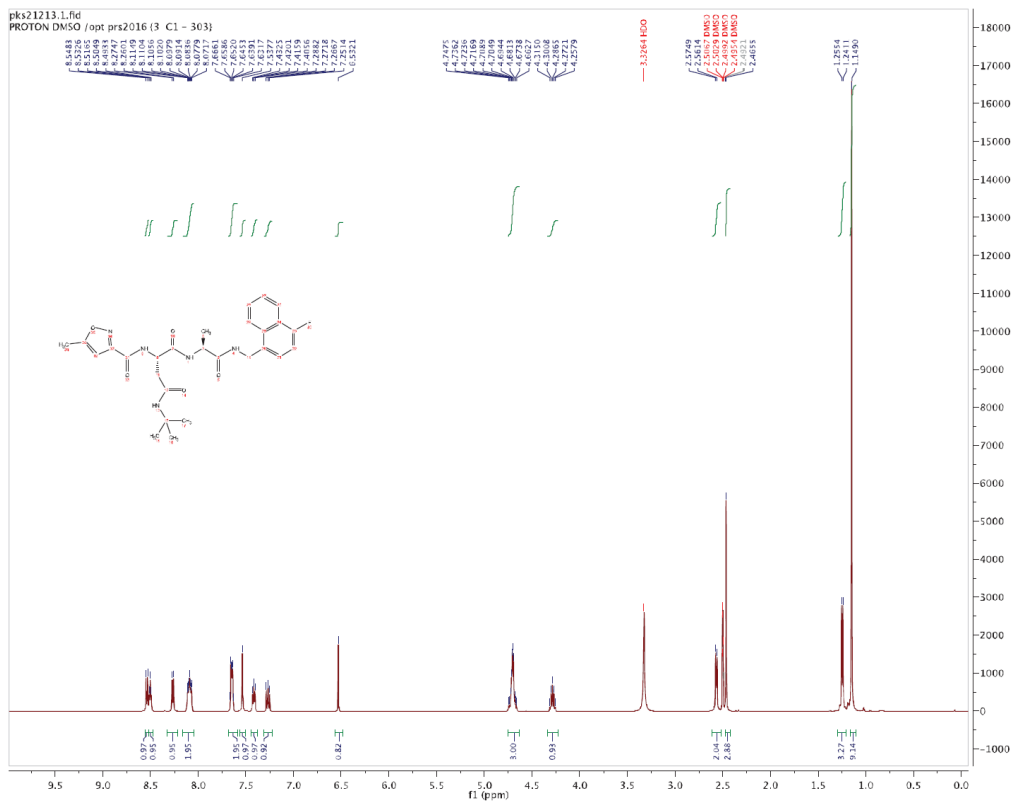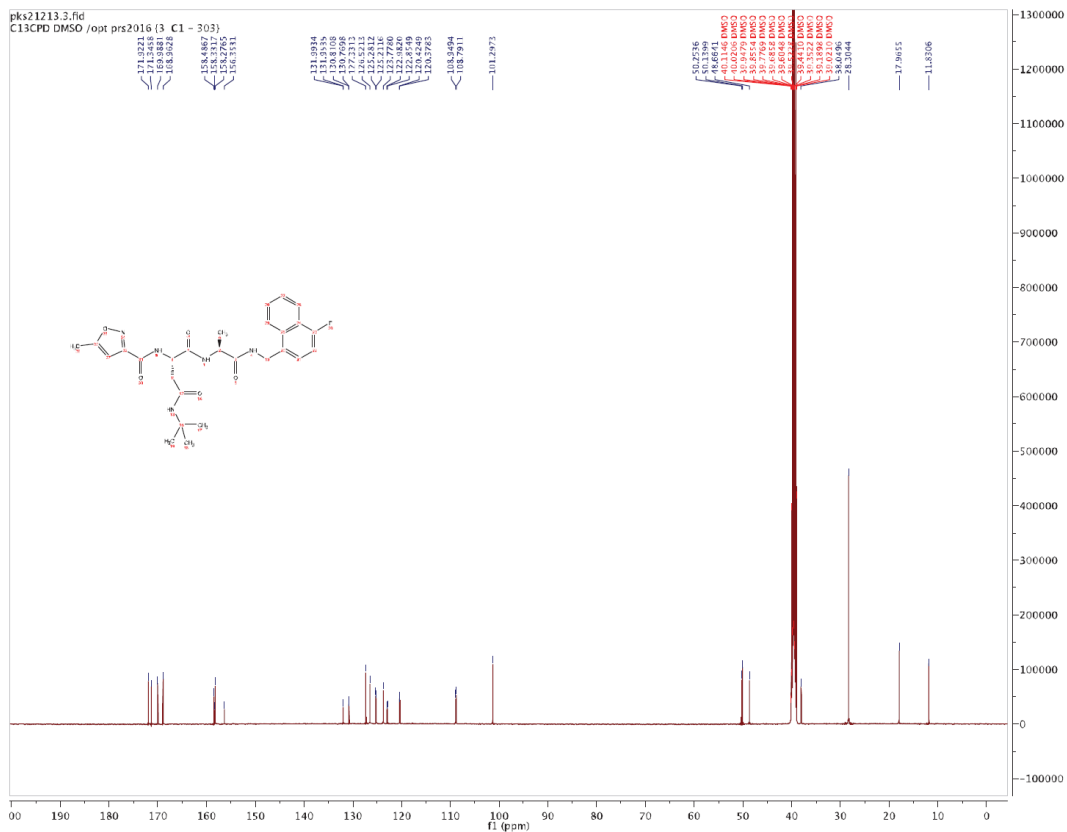

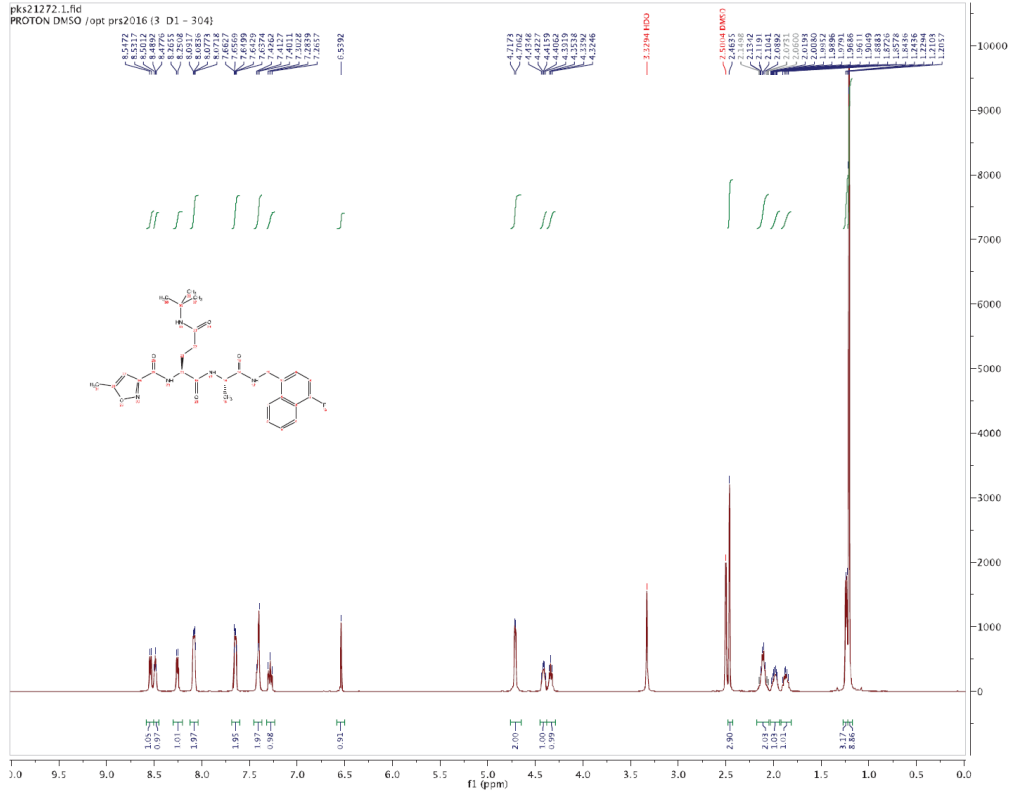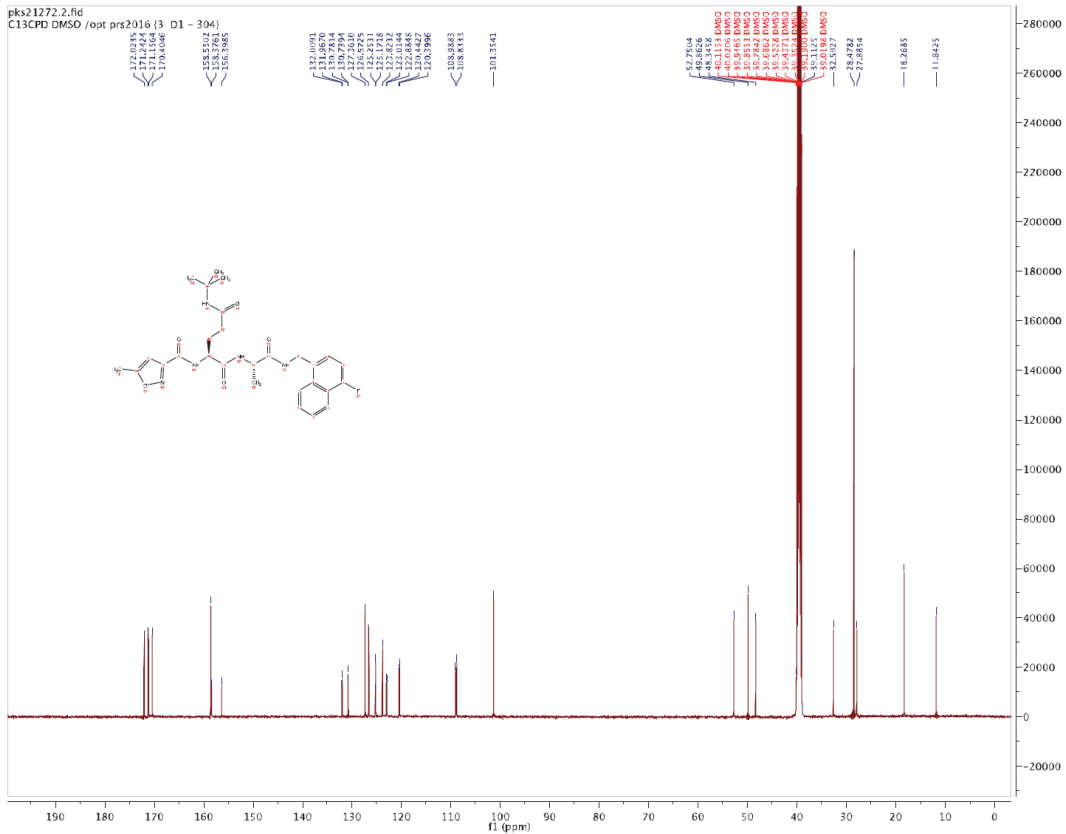





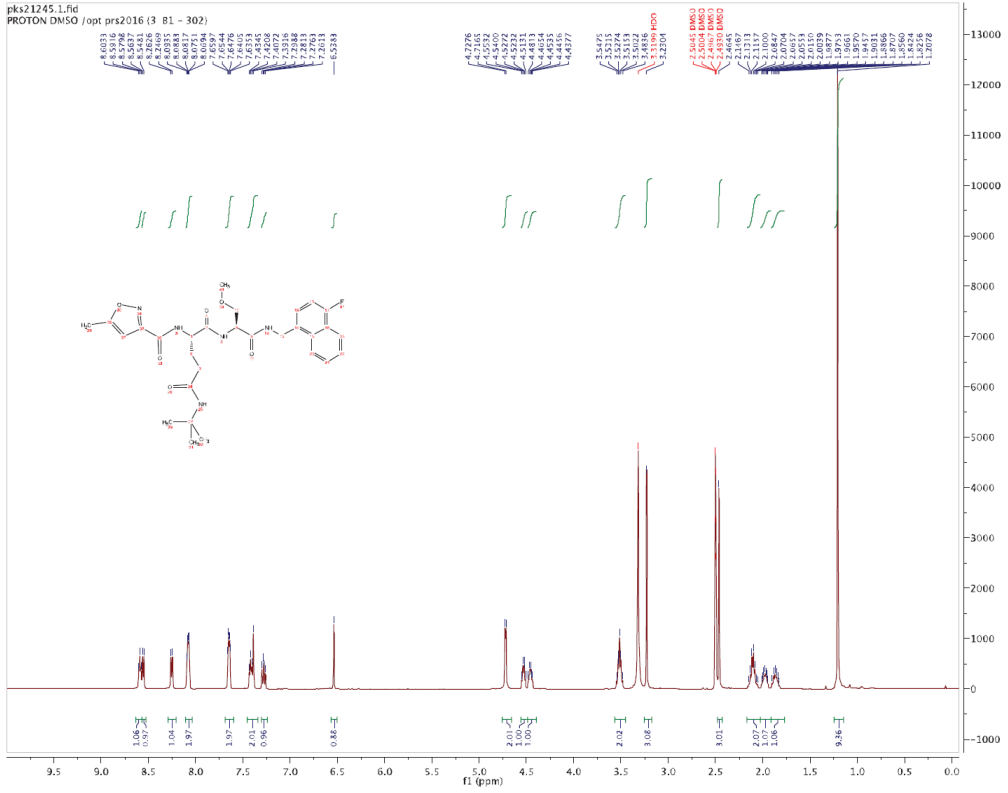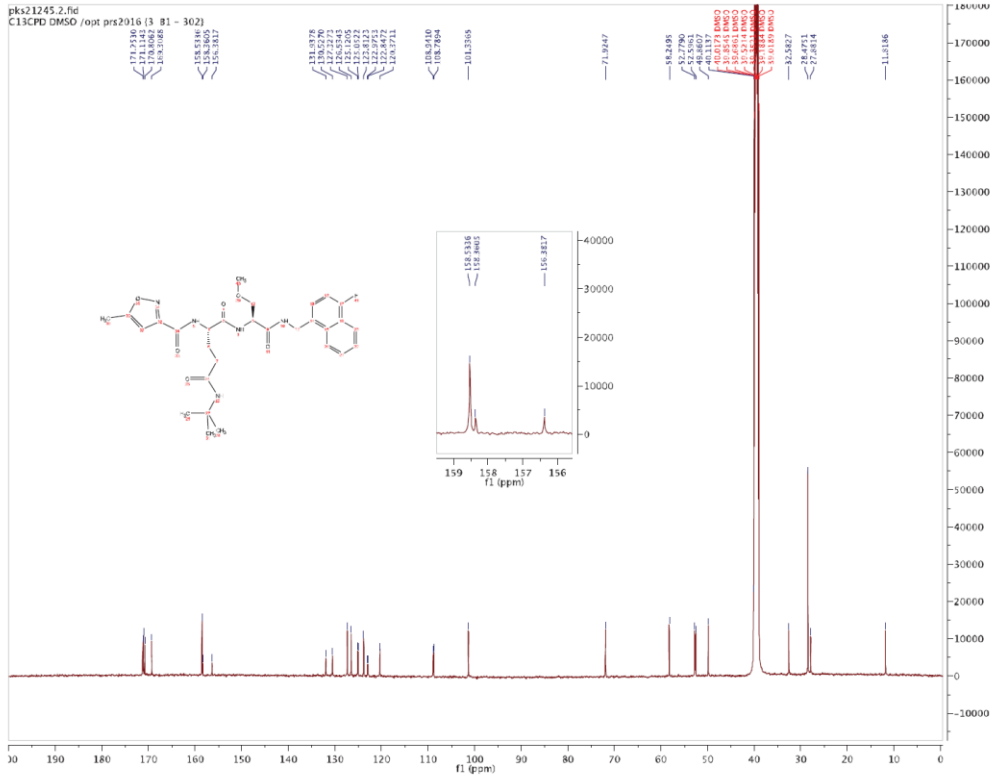











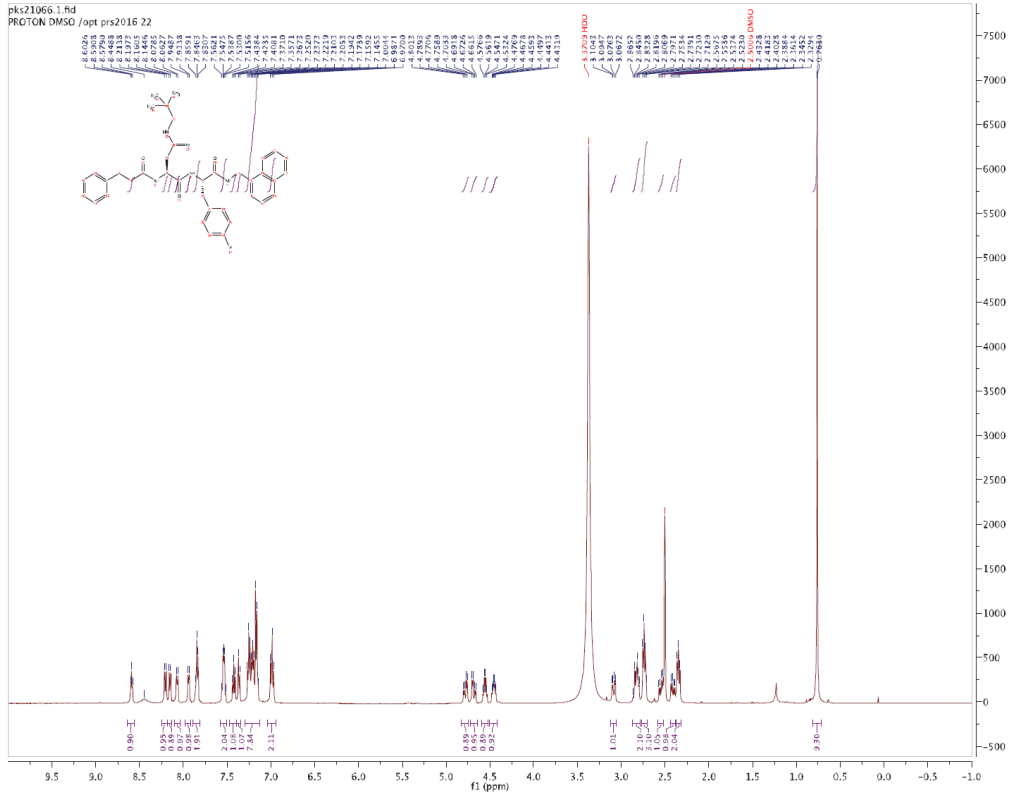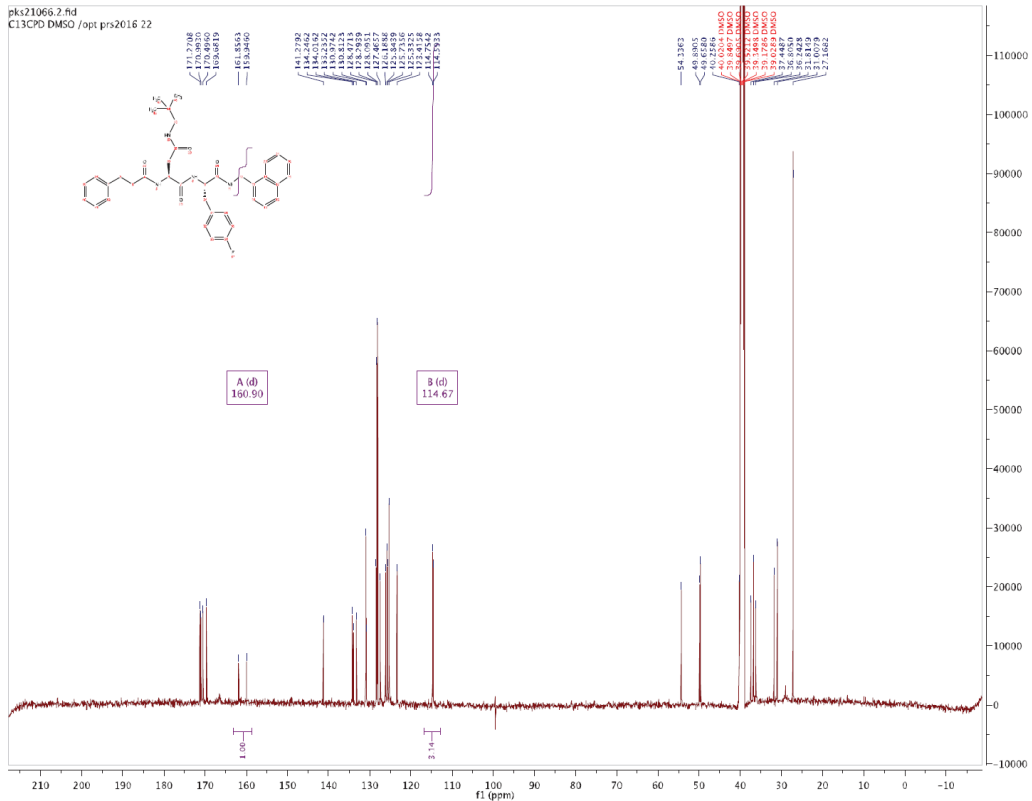



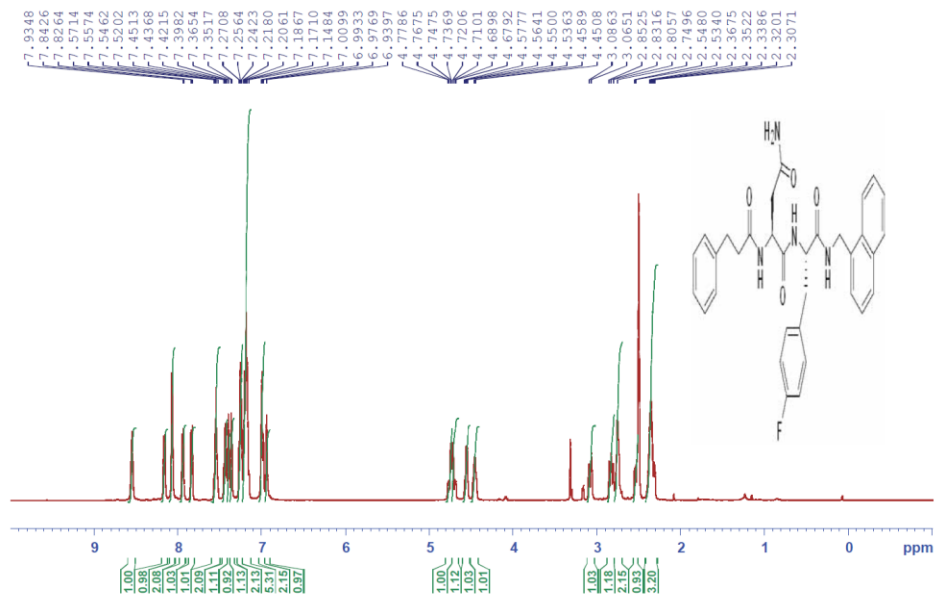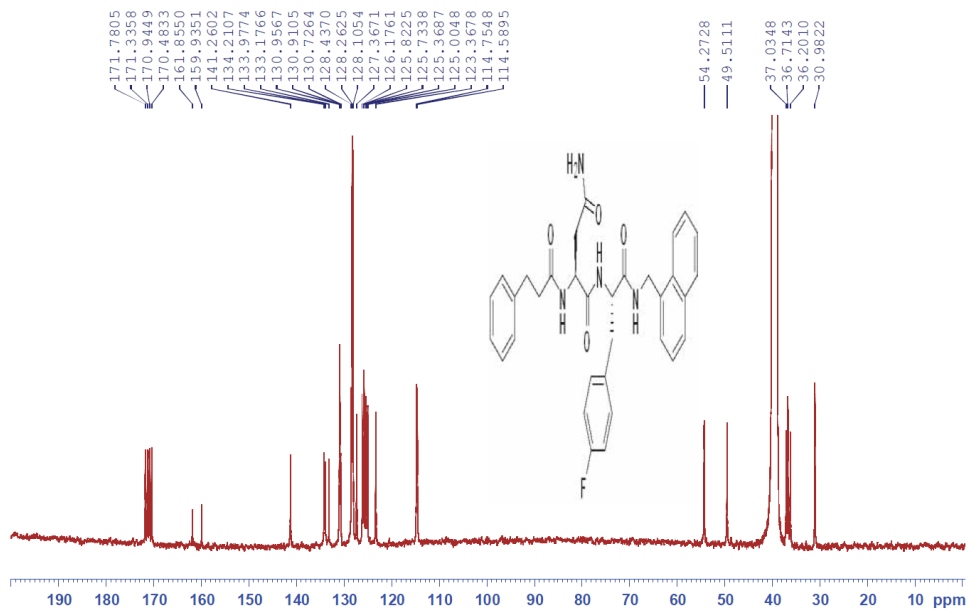

# HRMS

## Single Mass Analysis

Tolerance = 5.0 PPM / DBE: min = -1.5, max = 110.0

Element prediction: Off

Number of isotope peaks used for i-FIT = 4

Monoisotopic Mass, Even Electron Ions

89 formula(e) evaluated with 1 results within limits (up to 20 closest results for each mass)

Elements Used:

C: 0-32 H: 0-41 N: 0-5 O: 0-7 Na: 0-1

C<sub>29</sub>H<sub>40</sub>N<sub>4</sub>O<sub>7</sub>

PK2160 8 (0.178) Cm (5:10)

1: TOF MS ES+  
1.11e+004

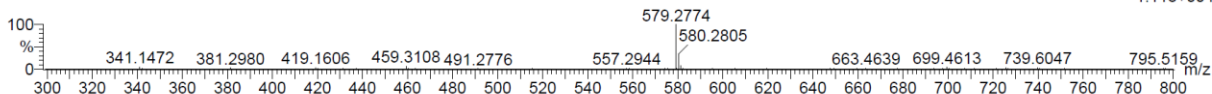

Minimum: -1.5  
Maximum: 5.0 5.0 110.0

| Mass     | Calc. Mass | mDa  | PPM  | DBE  | i-FIT | Formula                                                          |
|----------|------------|------|------|------|-------|------------------------------------------------------------------|
| 579.2774 | 579.2795   | -2.1 | -3.6 | 11.5 | 5.9   | C <sub>29</sub> H <sub>40</sub> N <sub>4</sub> O <sub>7</sub> Na |

## Single Mass Analysis

Tolerance = 5.0 PPM / DBE: min = -1.5, max = 110.0

Element prediction: Off

Number of isotope peaks used for i-FIT = 4

Monoisotopic Mass, Even Electron Ions

98 formula(e) evaluated with 1 results within limits (up to 20 closest results for each mass)

Elements Used:

C: 0-30 H: 0-42 N: 0-5 O: 0-8 Na: 0-1

C<sub>30</sub>H<sub>42</sub>N<sub>4</sub>O<sub>8</sub>

PK2211 5 (0.127) Cm (4:8)

1: TOF MS ES+  
1.12e+004

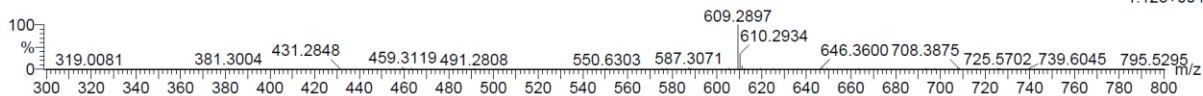

Minimum: -1.5  
Maximum: 5.0 5.0 110.0

| Mass     | Calc. Mass | mDa  | PPM  | DBE  | i-FIT | Formula                                                          |
|----------|------------|------|------|------|-------|------------------------------------------------------------------|
| 609.2897 | 609.2900   | -0.3 | -0.5 | 11.5 | 5.5   | C <sub>30</sub> H <sub>42</sub> N <sub>4</sub> O <sub>8</sub> Na |

## Single Mass Analysis

Tolerance = 5.0 PPM / DBE: min = -1.5, max = 110.0

Element prediction: Off

Number of isotope peaks used for i-FIT = 4

Monoisotopic Mass, Even Electron Ions

97 formula(e) evaluated with 1 results within limits (up to 20 closest results for each mass)

Elements Used:

C: 0-31 H: 0-43 N: 0-5 O: 0-8 Na: 0-1

C<sub>31</sub>H<sub>43</sub>N<sub>5</sub>O<sub>6</sub>

PK2226 14 (0.326) Cm (9:15)

1: TOF MS ES+  
8.57e+003

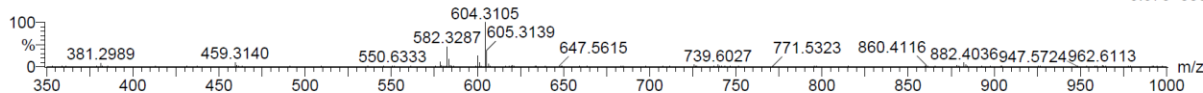

Minimum: -1.5  
Maximum: 5.0 5.0 110.0

| Mass     | Calc. Mass | mDa  | PPM  | DBE  | i-FIT | Formula                                                          |
|----------|------------|------|------|------|-------|------------------------------------------------------------------|
| 604.3105 | 604.3111   | -0.6 | -1.0 | 12.5 | 13.0  | C <sub>31</sub> H <sub>43</sub> N <sub>5</sub> O <sub>6</sub> Na |

### Single Mass Analysis

Tolerance = 5.0 PPM / DBE: min = -1.5, max = 110.0

Element prediction: Off

Number of isotope peaks used for i-FIT = 4

Monoisotopic Mass, Even Electron Ions

95 formula(e) evaluated with 1 results within limits (up to 20 closest results for each mass)

Elements Used:

C: 0-31 H: 0-42 N: 0-5 O: 0-8 Na: 0-1

C31H39N5O6

PK2220 5 (0.127) Cm (4:8)

1: TOF MS ES+  
8.71e+003

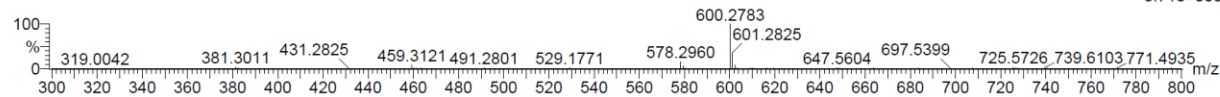

Minimum: -1.5  
Maximum: 5.0 5.0 110.0

| Mass     | Calc. Mass | mDa  | PPM  | DBE  | i-FIT | Formula          |
|----------|------------|------|------|------|-------|------------------|
| 600.2783 | 600.2798   | -1.5 | -2.5 | 14.5 | 2.1   | C31 H39 N5 O6 Na |

### Single Mass Analysis

Tolerance = 5.0 PPM / DBE: min = -1.5, max = 110.0

Element prediction: Off

Number of isotope peaks used for i-FIT = 4

Monoisotopic Mass, Even Electron Ions

57 formula(e) evaluated with 1 results within limits (up to 20 closest results for each mass)

Elements Used:

C: 0-33 H: 0-41 N: 0-5 O: 0-5 Na: 0-1

C31H36N4O5

PK2209 6 (0.144) Cm (5:9)

1: TOF MS ES+  
5.13e+003

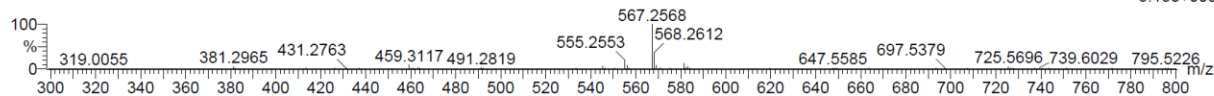

Minimum: -1.5  
Maximum: 5.0 5.0 110.0

| Mass     | Calc. Mass | mDa  | PPM  | DBE  | i-FIT | Formula          |
|----------|------------|------|------|------|-------|------------------|
| 567.2568 | 567.2583   | -1.5 | -2.6 | 15.5 | 2.4   | C31 H36 N4 O5 Na |

### Single Mass Analysis

Tolerance = 5.0 PPM / DBE: min = -1.5, max = 110.0

Element prediction: Off

Number of isotope peaks used for i-FIT = 4

Monoisotopic Mass, Even Electron Ions

80 formula(e) evaluated with 1 results within limits (up to 20 closest results for each mass)

Elements Used:

C: 0-32 H: 0-40 N: 0-4 O: 0-8 Na: 0-1

C32H40N4O5

PK2230 6 (0.144) Cm (5:8)

1: TOF MS ES+  
7.13e+003

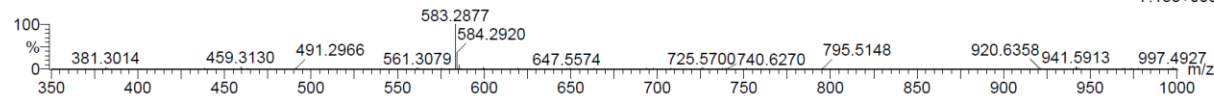

Minimum: -1.5  
Maximum: 5.0 5.0 110.0

| Mass     | Calc. Mass | mDa  | PPM  | DBE  | i-FIT | Formula          |
|----------|------------|------|------|------|-------|------------------|
| 583.2877 | 583.2896   | -1.9 | -3.3 | 14.5 | 3.6   | C32 H40 N4 O5 Na |

### Single Mass Analysis

Tolerance = 5.0 PPM / DBE: min = -1.5, max = 110.0

Element prediction: Off

Number of isotope peaks used for i-FIT = 4

Monoisotopic Mass, Even Electron Ions

89 formula(e) evaluated with 1 results within limits (up to 20 closest results for each mass)

Elements Used:

C: 0-33 H: 0-42 N: 0-5 O: 0-6 Na: 0-1

C<sub>28</sub>H<sub>35</sub>N<sub>5</sub>O<sub>6</sub>

PK2244 5 (0.127) Cm (4:9)

1: TOF MS ES+  
1.22e+004

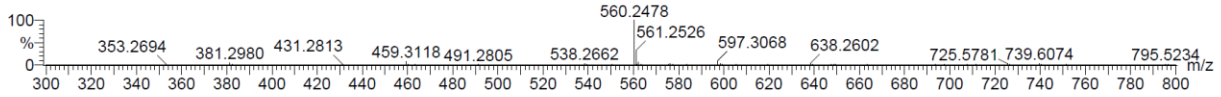

Minimum: -1.5  
Maximum: 5.0 5.0 110.0

| Mass     | Calc. Mass | mDa  | PPM  | DBE  | i-FIT | Formula                                                          |
|----------|------------|------|------|------|-------|------------------------------------------------------------------|
| 560.2478 | 560.2485   | -0.7 | -1.2 | 13.5 | 2.3   | C <sub>28</sub> H <sub>35</sub> N <sub>5</sub> O <sub>6</sub> Na |

### Single Mass Analysis

Tolerance = 5.0 PPM / DBE: min = -1.5, max = 110.0

Element prediction: Off

Number of isotope peaks used for i-FIT = 4

Monoisotopic Mass, Even Electron Ions

52 formula(e) evaluated with 1 results within limits (up to 20 closest results for each mass)

Elements Used:

C: 0-33 H: 0-42 N: 0-4 O: 0-5 Na: 0-1

C<sub>33</sub>H<sub>42</sub>N<sub>4</sub>O<sub>5</sub>

PK2243 14 (0.326) Cm (11:16)

1: TOF MS ES+  
9.74e+003

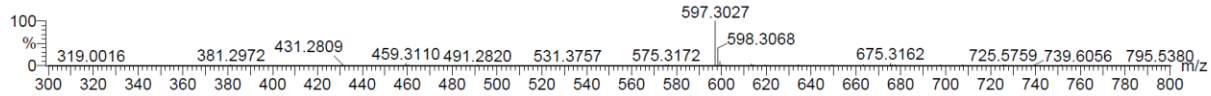

Minimum: -1.5  
Maximum: 5.0 5.0 110.0

| Mass     | Calc. Mass | mDa  | PPM  | DBE  | i-FIT | Formula                                                          |
|----------|------------|------|------|------|-------|------------------------------------------------------------------|
| 597.3027 | 597.3053   | -2.6 | -4.4 | 14.5 | 6.0   | C <sub>33</sub> H <sub>42</sub> N <sub>4</sub> O <sub>5</sub> Na |

### Single Mass Analysis

Tolerance = 5.0 PPM / DBE: min = -1.5, max = 110.0

Element prediction: Off

Number of isotope peaks used for i-FIT = 4

Monoisotopic Mass, Even Electron Ions

79 formula(e) evaluated with 1 results within limits (up to 20 closest results for each mass)

Elements Used:

C: 0-33 H: 0-42 N: 0-5 O: 0-6 Na: 0-1

C<sub>32</sub>H<sub>40</sub>N<sub>4</sub>O<sub>4</sub>

PK2255 6 (0.144) Cm (4:7)

1: TOF MS ES+  
1.16e+004

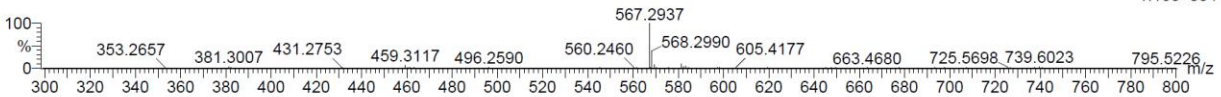

Minimum: -1.5  
Maximum: 5.0 5.0 110.0

| Mass     | Calc. Mass | mDa  | PPM  | DBE  | i-FIT | Formula                                                          |
|----------|------------|------|------|------|-------|------------------------------------------------------------------|
| 567.2937 | 567.2947   | -1.0 | -1.8 | 14.5 | 0.4   | C <sub>32</sub> H <sub>40</sub> N <sub>4</sub> O <sub>4</sub> Na |

### Single Mass Analysis

Tolerance = 5.0 PPM / DBE: min = -1.5, max = 110.0

Element prediction: Off

Number of isotope peaks used for i-FIT = 4

Monoisotopic Mass, Even Electron Ions

89 formula(e) evaluated with 1 results within limits (up to 20 closest results for each mass)

Elements Used:

C: 0-32 H: 0-39 N: 0-4 O: 0-4 F: 0-1 Na: 0-1

C32H39FN4O4

PKS21210 5 (0.127) Cm (5:8)

1: TOF MS ES+  
1.78e+004

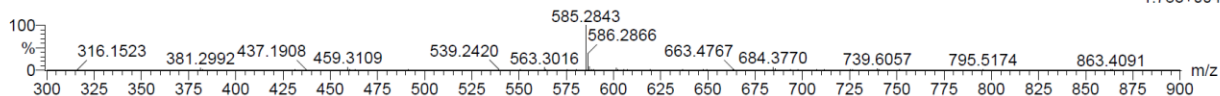

Minimum: -1.5  
Maximum: 5.0 5.0 110.0

| Mass     | Calc. Mass | mDa  | PPM  | DBE  | i-FIT | Formula            |
|----------|------------|------|------|------|-------|--------------------|
| 585.2843 | 585.2853   | -1.0 | -1.7 | 14.5 | 5.3   | C32 H39 N4 O4 F Na |

### Single Mass Analysis

Tolerance = 5.0 PPM / DBE: min = -1.5, max = 110.0

Element prediction: Off

Number of isotope peaks used for i-FIT = 4

Monoisotopic Mass, Even Electron Ions

63 formula(e) evaluated with 1 results within limits (up to 20 closest results for each mass)

Elements Used:

C: 0-32 H: 0-41 N: 0-5 O: 0-5 Na: 0-1

C32H35N5O5

PK3053 26 (0.598) Cm (25:27)

1: TOF MS ES+  
3.27e+004

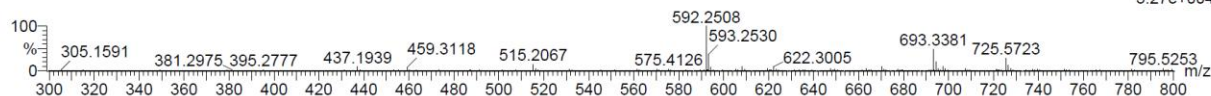

Minimum: -1.5  
Maximum: 5.0 5.0 110.0

| Mass     | Calc. Mass | mDa  | PPM  | DBE  | i-FIT | Formula          |
|----------|------------|------|------|------|-------|------------------|
| 592.2508 | 592.2536   | -2.8 | -4.7 | 17.5 | 18.9  | C32 H35 N5 O5 Na |

### Single Mass Analysis

Tolerance = 5.0 PPM / DBE: min = -1.5, max = 110.0

Element prediction: Off

Number of isotope peaks used for i-FIT = 4

Monoisotopic Mass, Even Electron Ions

143 formula(e) evaluated with 1 results within limits (up to 20 closest results for each mass)

Elements Used:

C: 0-31 H: 0-39 N: 0-5 O: 0-6 F: 0-1 Na: 0-1

C31H37FN4O4

PKS21271 8 (0.179) Cm (5:8)

1: TOF MS ES+  
1.33e+004

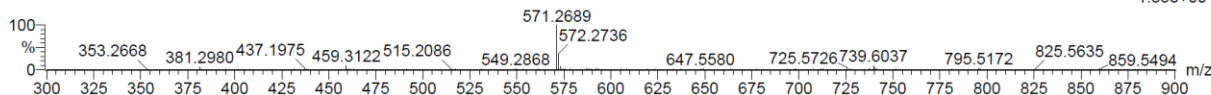

Minimum: -1.5  
Maximum: 5.0 5.0 110.0

| Mass     | Calc. Mass | mDa  | PPM  | DBE  | i-FIT | Formula            |
|----------|------------|------|------|------|-------|--------------------|
| 571.2689 | 571.2697   | -0.8 | -1.4 | 14.5 | 1.1   | C31 H37 N4 O4 F Na |

### Single Mass Analysis

Tolerance = 5.0 PPM / DBE: min = -1.5, max = 110.0

Element prediction: Off

Number of isotope peaks used for i-FIT = 4

Monoisotopic Mass, Even Electron Ions

134 formula(e) evaluated with 1 results within limits (up to 20 closest results for each mass)

Elements Used:

C: 0-27 H: 0-32 N: 0-5 O: 0-5 F: 0-1 Na: 0-1

C27H32FN5O5

PKS21213 16 (0.360) Cm (15:21)

1: TOF MS ES+  
1.91e+004

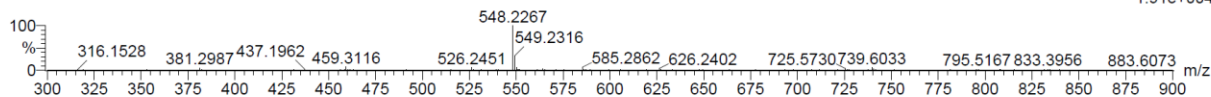

Minimum: -1.5  
Maximum: 5.0 5.0 110.0

| Mass     | Calc. Mass | mDa  | PPM  | DBE  | i-FIT | Formula            |
|----------|------------|------|------|------|-------|--------------------|
| 548.2267 | 548.2285   | -1.8 | -3.3 | 13.5 | 4.5   | C27 H32 N5 O5 F Na |

### Single Mass Analysis

Tolerance = 5.0 PPM / DBE: min = -1.5, max = 110.0

Element prediction: Off

Number of isotope peaks used for i-FIT = 4

Monoisotopic Mass, Even Electron Ions

151 formula(e) evaluated with 1 results within limits (up to 20 closest results for each mass)

Elements Used:

C: 0-28 H: 0-39 N: 0-5 O: 0-6 F: 0-1 Na: 0-1

C28H34FN5O5

PKS21272 16 (0.360) Cm (13:16)

1: TOF MS ES+  
1.60e+004

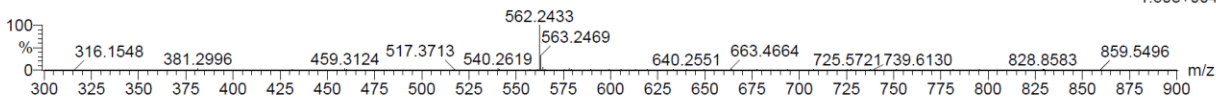

Minimum: -1.5  
Maximum: 5.0 5.0 110.0

| Mass     | Calc. Mass | mDa  | PPM  | DBE  | i-FIT | Formula            |
|----------|------------|------|------|------|-------|--------------------|
| 562.2433 | 562.2442   | -0.9 | -1.6 | 13.5 | 1.1   | C28 H34 N5 O5 F Na |

### Single Mass Analysis

Tolerance = 5.0 PPM / DBE: min = -1.5, max = 110.0

Element prediction: Off

Number of isotope peaks used for i-FIT = 4

Monoisotopic Mass, Even Electron Ions

158 formula(e) evaluated with 1 results within limits (up to 20 closest results for each mass)

Elements Used:

C: 0-28 H: 0-34 N: 0-5 O: 0-6 F: 0-1 Na: 0-1

C28H34FN5O6

PKS21244 5 (0.127) Cm (5:10)

1: TOF MS ES+  
2.89e+004

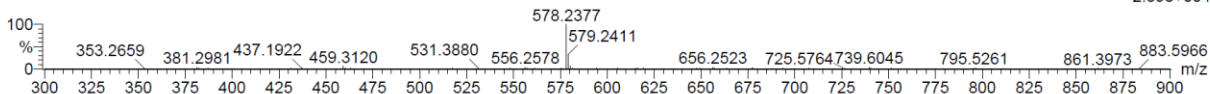

Minimum: -1.5  
Maximum: 5.0 5.0 110.0

| Mass     | Calc. Mass | mDa  | PPM  | DBE  | i-FIT | Formula            |
|----------|------------|------|------|------|-------|--------------------|
| 578.2377 | 578.2391   | -1.4 | -2.4 | 13.5 | 8.4   | C28 H34 N5 O6 F Na |

### Single Mass Analysis

Tolerance = 5.0 PPM / DBE: min = -1.5, max = 110.0

Element prediction: Off

Number of isotope peaks used for i-FIT = 4

Monoisotopic Mass, Even Electron Ions

158 formula(e) evaluated with 1 results within limits (up to 20 closest results for each mass)

Elements Used:

C: 0-29 H: 0-36 N: 0-5 O: 0-6 F: 0-1 Na: 0-1

C<sub>29</sub>H<sub>36</sub>FN<sub>5</sub>O<sub>6</sub>

PKS21245 8 (0.179) Cm (5:8)

1: TOF MS ES+  
1.68e+004

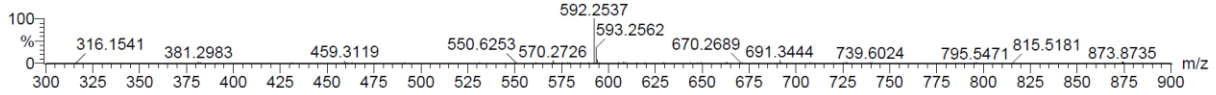

Minimum: -1.5  
Maximum: 5.0 5.0 110.0

| Mass     | Calc. Mass | mDa  | PPM  | DBE  | i-FIT | Formula                                                            |
|----------|------------|------|------|------|-------|--------------------------------------------------------------------|
| 592.2537 | 592.2547   | -1.0 | -1.7 | 13.5 | 3.0   | C <sub>29</sub> H <sub>36</sub> N <sub>5</sub> O <sub>6</sub> F Na |

### Single Mass Analysis

Tolerance = 5.0 PPM / DBE: min = -1.5, max = 110.0

Element prediction: Off

Number of isotope peaks used for i-FIT = 4

Monoisotopic Mass, Even Electron Ions

158 formula(e) evaluated with 1 results within limits (up to 20 closest results for each mass)

Elements Used:

C: 0-29 H: 0-36 N: 0-5 O: 0-6 F: 0-1 Na: 0-1

C<sub>29</sub>H<sub>36</sub>FN<sub>5</sub>O<sub>6</sub>

PKS21245 8 (0.179) Cm (5:8)

1: TOF MS ES+  
1.68e+004

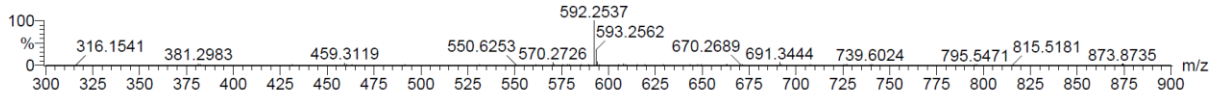

Minimum: -1.5  
Maximum: 5.0 5.0 110.0

| Mass     | Calc. Mass | mDa  | PPM  | DBE  | i-FIT | Formula                                                            |
|----------|------------|------|------|------|-------|--------------------------------------------------------------------|
| 592.2537 | 592.2547   | -1.0 | -1.7 | 13.5 | 3.0   | C <sub>29</sub> H <sub>36</sub> N <sub>5</sub> O <sub>6</sub> F Na |

### Single Mass Analysis

Tolerance = 5.0 PPM / DBE: min = -1.5, max = 110.0

Element prediction: Off

Number of isotope peaks used for i-FIT = 4

Monoisotopic Mass, Even Electron Ions

229 formula(e) evaluated with 1 results within limits (up to 20 closest results for each mass)

Elements Used:

C: 0-29 H: 0-35 N: 0-4 O: 0-5 F: 0-1 Na: 0-1 S: 0-1

C<sub>29</sub>H<sub>35</sub>FN<sub>4</sub>O<sub>5</sub>S

PKS21206 13 (0.309) Cm (13:18)

1: TOF MS ES+  
6.22e+003

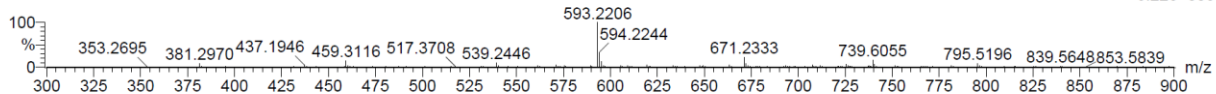

Minimum: -1.5  
Maximum: 5.0 5.0 110.0

| Mass     | Calc. Mass | mDa  | PPM  | DBE  | i-FIT | Formula                                                              |
|----------|------------|------|------|------|-------|----------------------------------------------------------------------|
| 593.2206 | 593.2210   | -0.4 | -0.7 | 13.5 | 5.1   | C <sub>29</sub> H <sub>35</sub> N <sub>4</sub> O <sub>5</sub> F Na S |

### Single Mass Analysis

Tolerance = 5.0 PPM / DBE: min = -1.5, max = 110.0

Element prediction: Off

Number of isotope peaks used for i-FIT = 4

Monoisotopic Mass, Even Electron Ions

229 formula(e) evaluated with 1 results within limits (up to 20 closest results for each mass)

Elements Used:

C: 0-30 H: 0-37 N: 0-4 O: 0-5 F: 0-1 Na: 0-1 S: 0-1

C30H37FN4O5S

PKS21209 16 (0.361) Cm (12:20)

1: TOF MS ES+  
1.34e+004

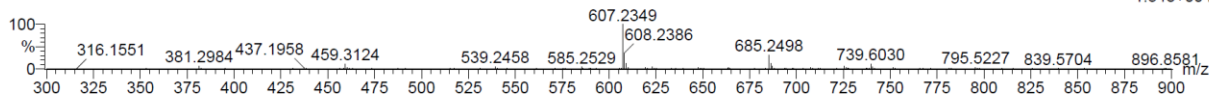

Minimum: -1.5  
Maximum: 5.0 5.0 110.0

| Mass     | Calc. Mass | mDa  | PPM  | DBE  | i-FIT | Formula              |
|----------|------------|------|------|------|-------|----------------------|
| 607.2349 | 607.2366   | -1.7 | -2.8 | 13.5 | 2.0   | C30 H37 N4 O5 F Na S |

### Single Mass Analysis

Tolerance = 5.0 PPM / DBE: min = -1.5, max = 110.0

Element prediction: Off

Number of isotope peaks used for i-FIT = 4

Monoisotopic Mass, Even Electron Ions

314 formula(e) evaluated with 1 results within limits (up to 20 closest results for each mass)

Elements Used:

C: 0-31 H: 0-39 N: 0-5 O: 0-6 F: 0-1 Na: 0-1 S: 0-1

C31H39FN4O6S

PKS21265 10 (0.235) Cm (9:15)

1: TOF MS ES+  
1.74e+004

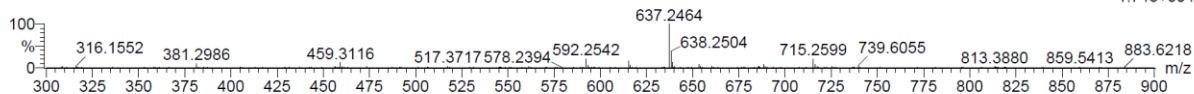

Minimum: -1.5  
Maximum: 5.0 5.0 110.0

| Mass     | Calc. Mass | mDa  | PPM  | DBE  | i-FIT | Formula              |
|----------|------------|------|------|------|-------|----------------------|
| 637.2464 | 637.2472   | -0.8 | -1.3 | 13.5 | 0.4   | C31 H39 N4 O6 F Na S |

### Single Mass Analysis

Tolerance = 5.0 PPM / DBE: min = -1.5, max = 110.0

Element prediction: Off

Number of isotope peaks used for i-FIT = 4

Monoisotopic Mass, Even Electron Ions

302 formula(e) evaluated with 1 results within limits (up to 20 closest results for each mass)

Elements Used:

C: 0-31 H: 0-39 N: 0-5 O: 0-6 F: 0-1 Na: 0-1 S: 0-1

C30H37FN4O6S

PKS21266 14 (0.326) Cm (13:16)

1: TOF MS ES+  
7.96e+003

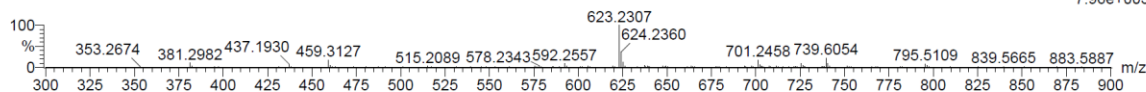

Minimum: -1.5  
Maximum: 5.0 5.0 110.0

| Mass     | Calc. Mass | mDa  | PPM  | DBE  | i-FIT | Formula              |
|----------|------------|------|------|------|-------|----------------------|
| 623.2307 | 623.2316   | -0.9 | -1.4 | 13.5 | 1.4   | C30 H37 N4 O6 F Na S |



### Single Mass Analysis

Tolerance = 5.0 PPM / DBE: min = -1.5, max = 110.0

Element prediction: Off

Number of isotope peaks used for i-FIT = 4

Monoisotopic Mass, Even Electron Ions

96 formula(e) evaluated with 1 results within limits (up to 20 closest results for each mass)

Elements Used:

C: 0-38 H: 0-45 N: 0-5 O: 0-4 F: 0-1 Na: 0-1

C38H43FN4O4

PK21066 39 (0.888) Cm (39:42)

1: TOF MS ES+  
1.07e+005

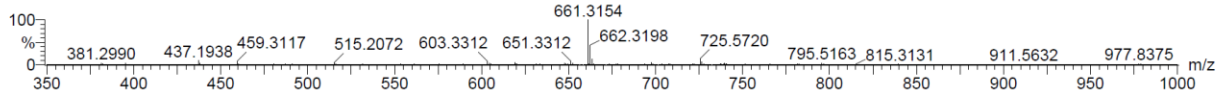

Minimum: -1.5  
Maximum: 5.0 5.0 110.0

| Mass     | Calc. Mass | mDa  | PPM  | DBE  | i-FIT | Formula            |
|----------|------------|------|------|------|-------|--------------------|
| 661.3154 | 661.3166   | -1.2 | -1.8 | 18.5 | 83.7  | C38 H43 N4 O4 F Na |

### Single Mass Analysis

Tolerance = 5.0 PPM / DBE: min = -1.5, max = 110.0

Element prediction: Off

Number of isotope peaks used for i-FIT = 4

Monoisotopic Mass, Even Electron Ions

95 formula(e) evaluated with 1 results within limits (up to 20 closest results for each mass)

Elements Used:

C: 0-33 H: 0-33 N: 0-5 O: 0-4 F: 0-1 Na: 0-1

C33H33FN4O4

PK21083 28 (0.632) Cm (27:29)

1: TOF MS ES+  
1.44e+004

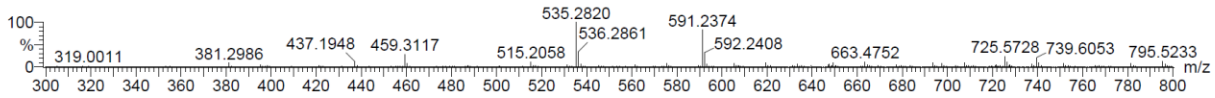

Minimum: -1.5  
Maximum: 5.0 5.0 110.0

| Mass     | Calc. Mass | mDa  | PPM  | DBE  | i-FIT | Formula            |
|----------|------------|------|------|------|-------|--------------------|
| 591.2374 | 591.2384   | -1.0 | -1.7 | 18.5 | 1.2   | C33 H33 N4 O4 F Na |

# HPLC

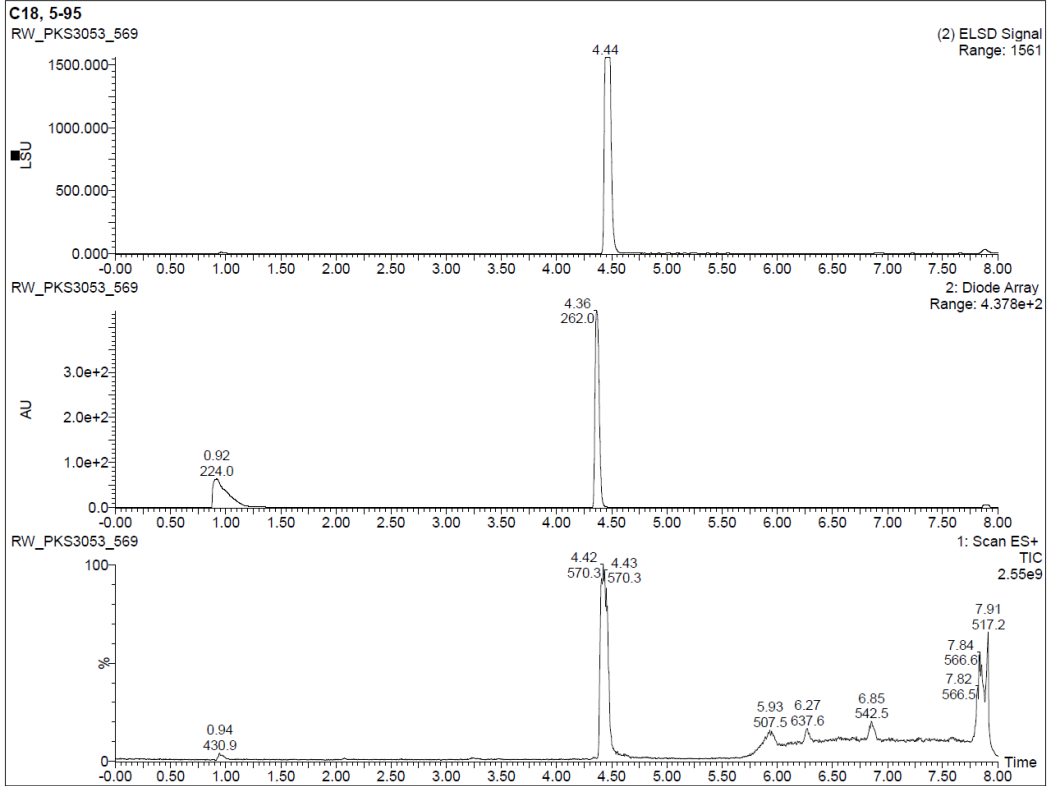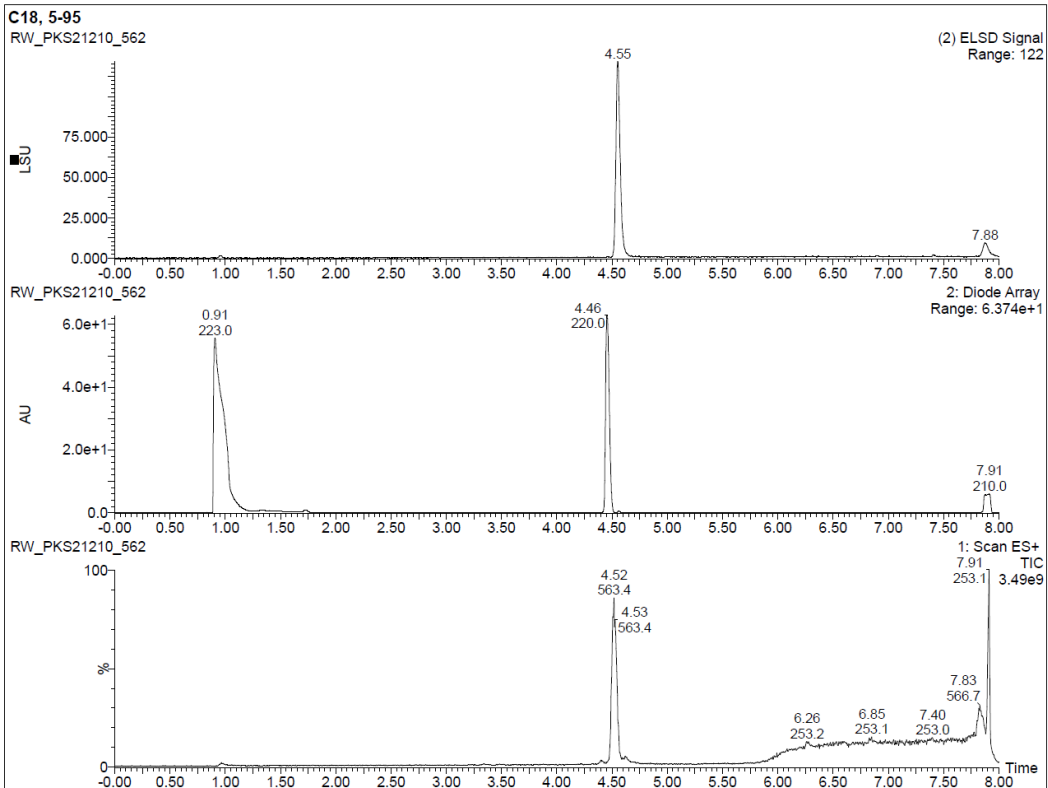

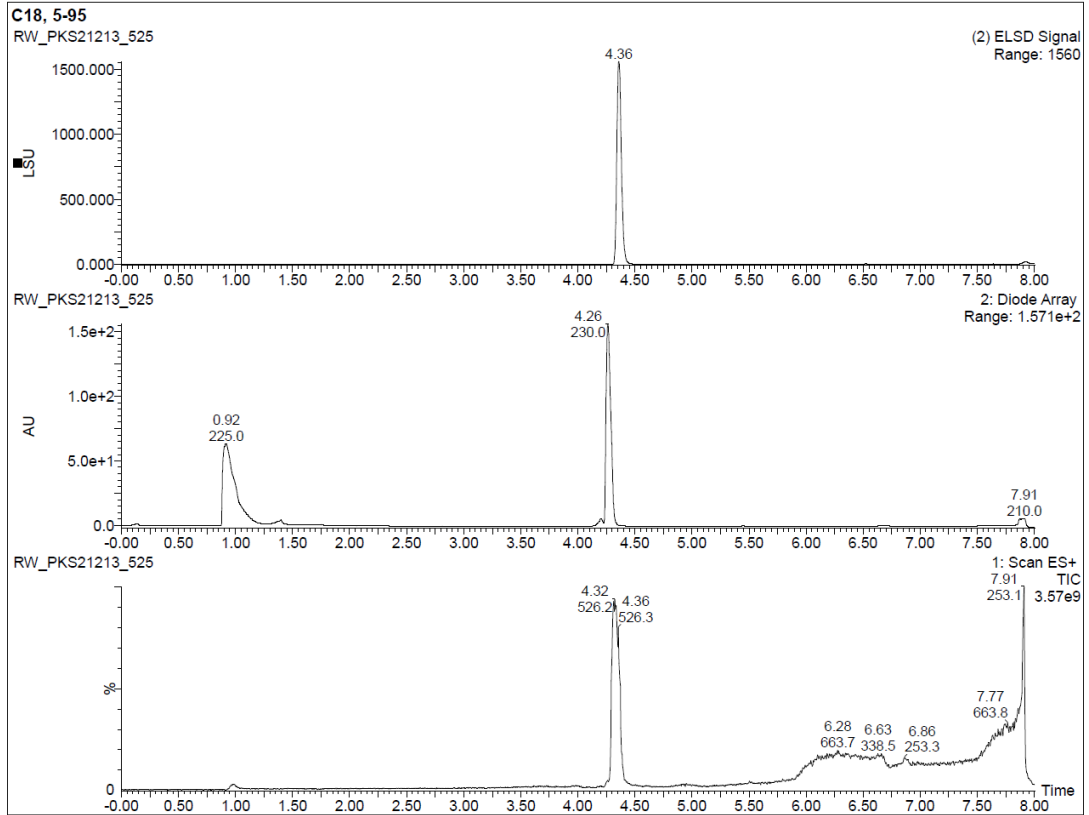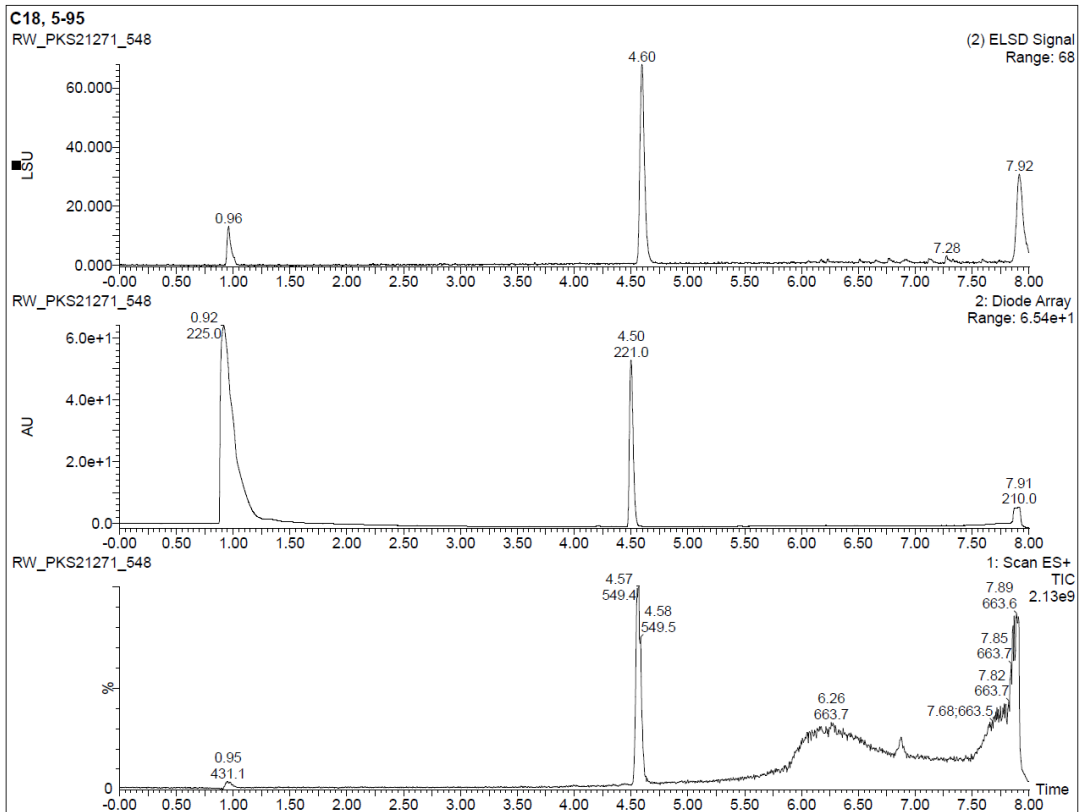

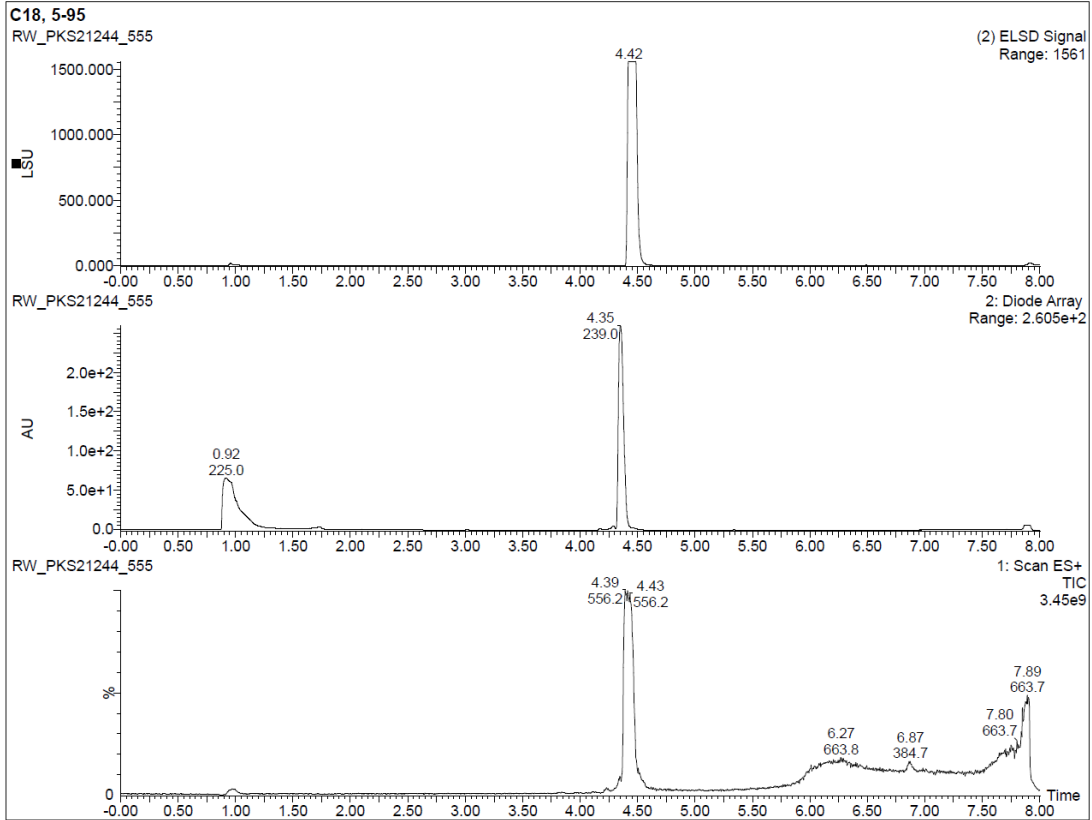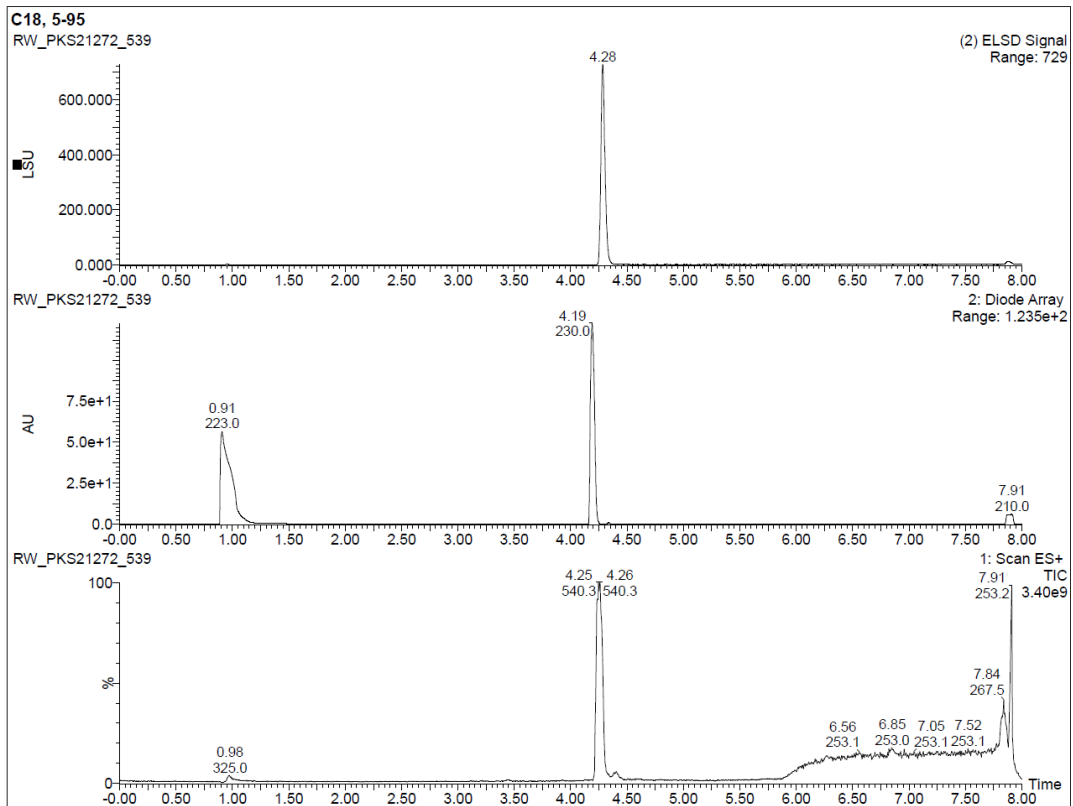

Supplement: NIHMS1693844-supplement-Supplementary_material.pdf [file NIHMS1693844-supplement-Supplementary_material.pdf]
